# Supplementary material
Source: publisher figshare collection journal article supplement (https://tandf.figshare.com/articles/dataset/_/5005487)

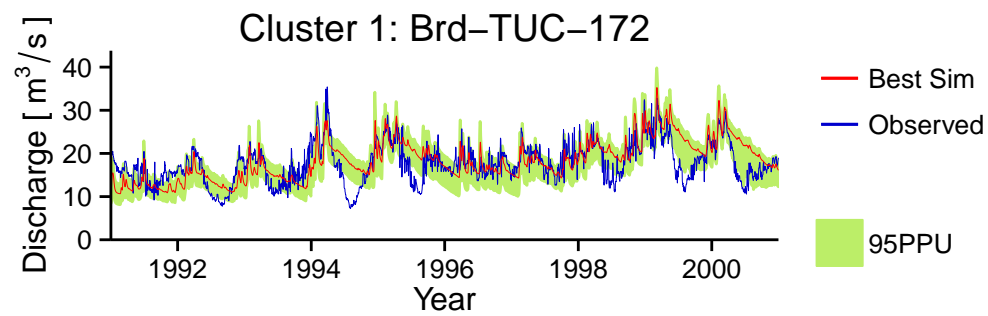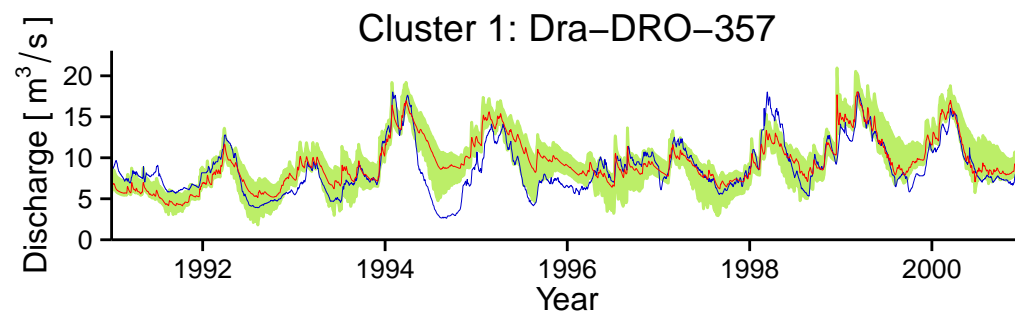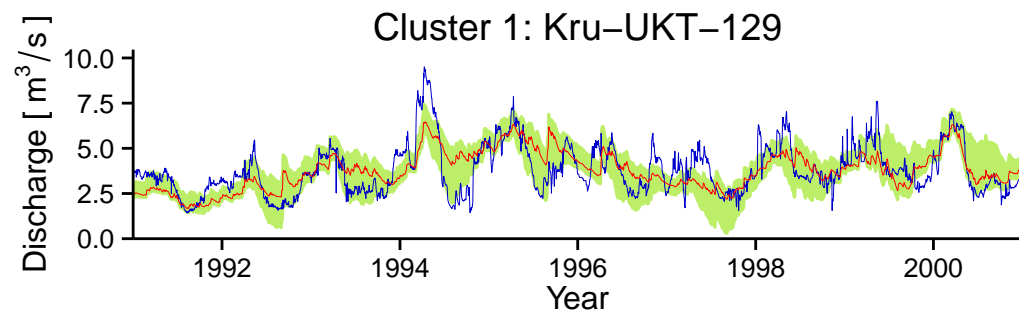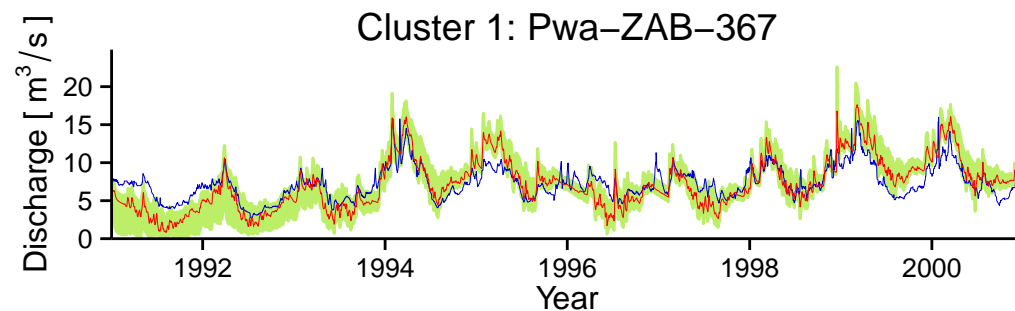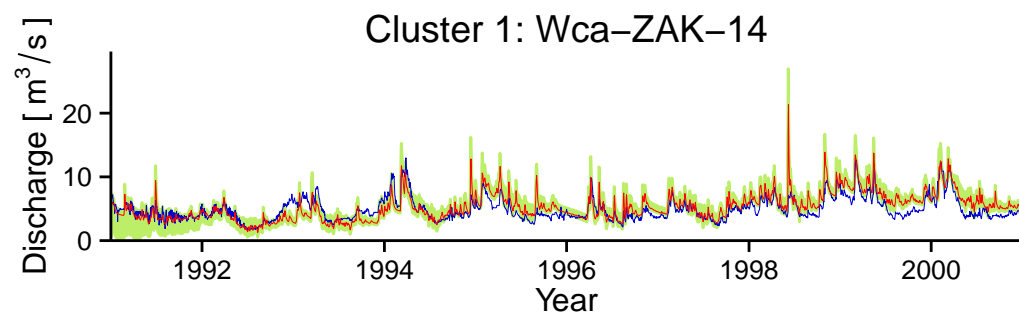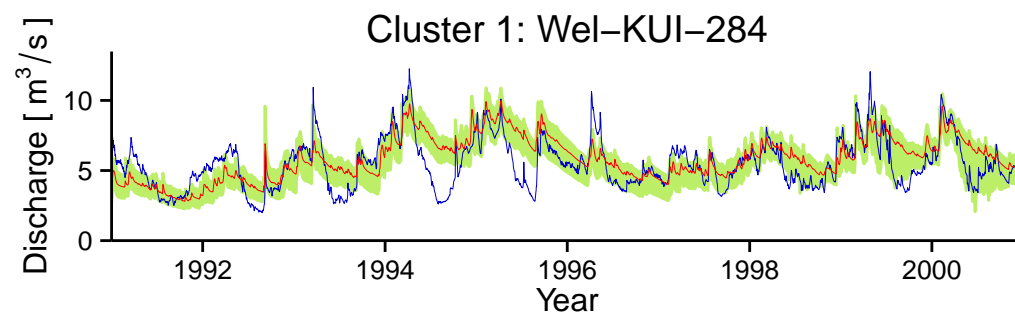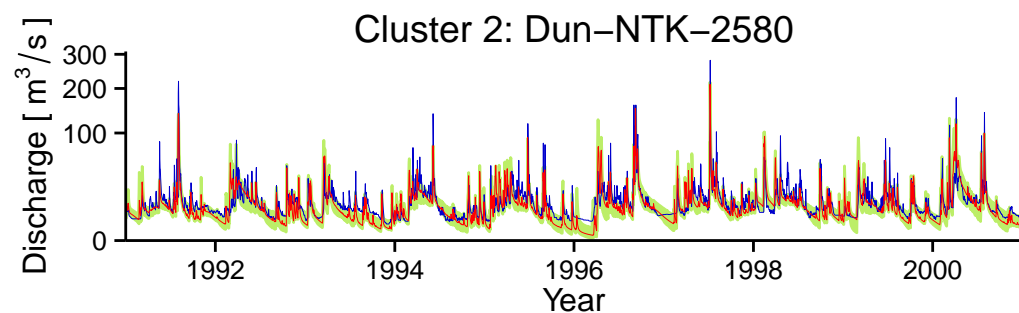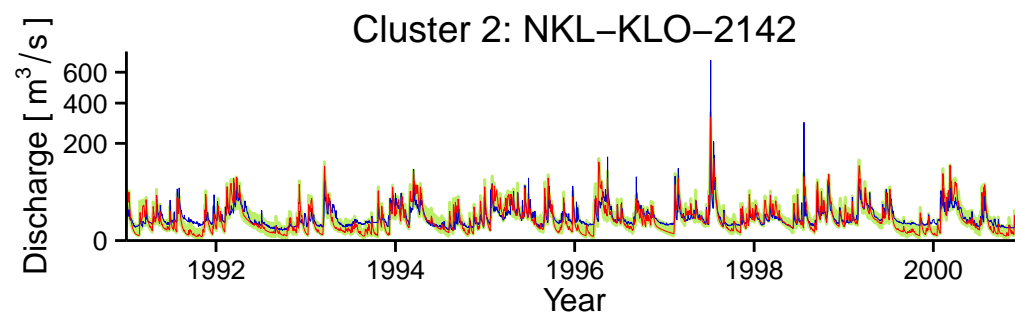

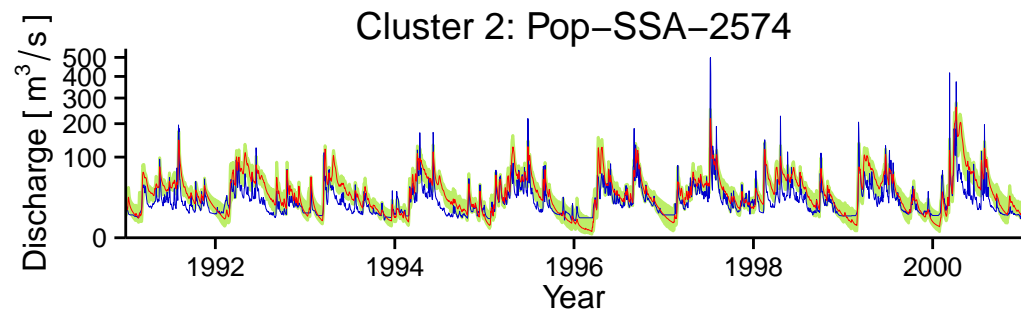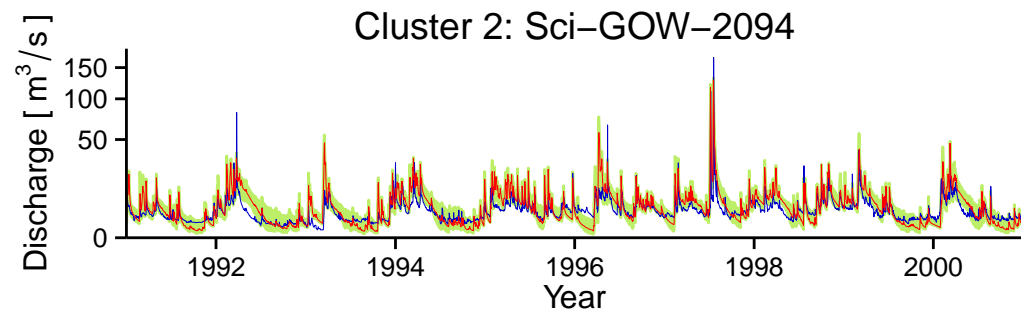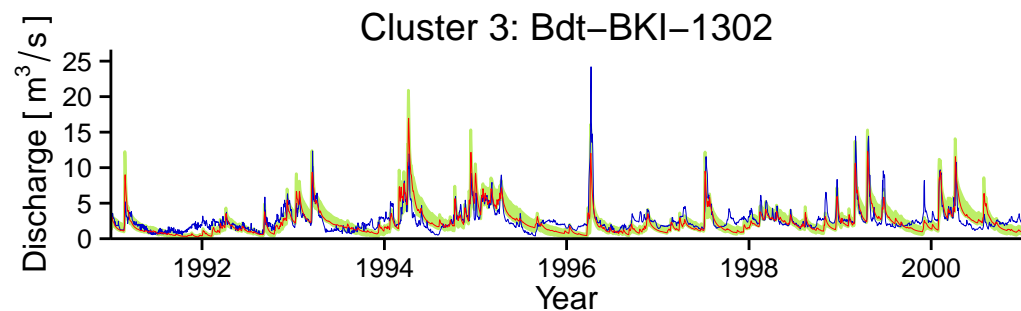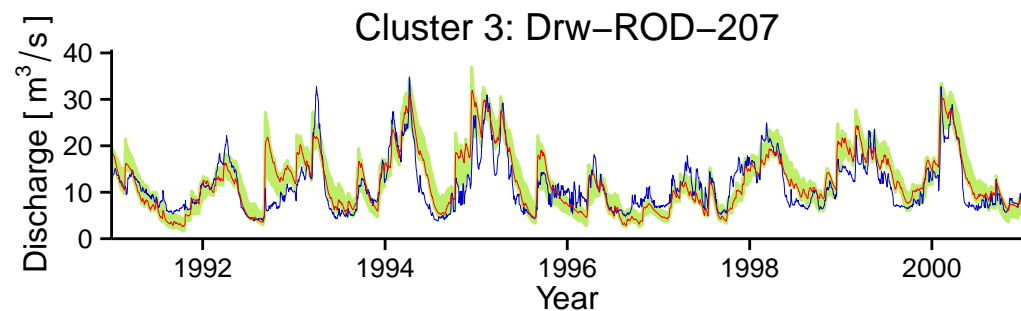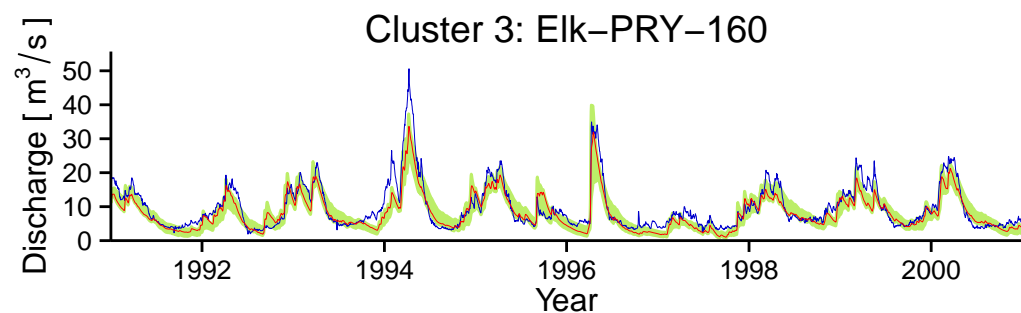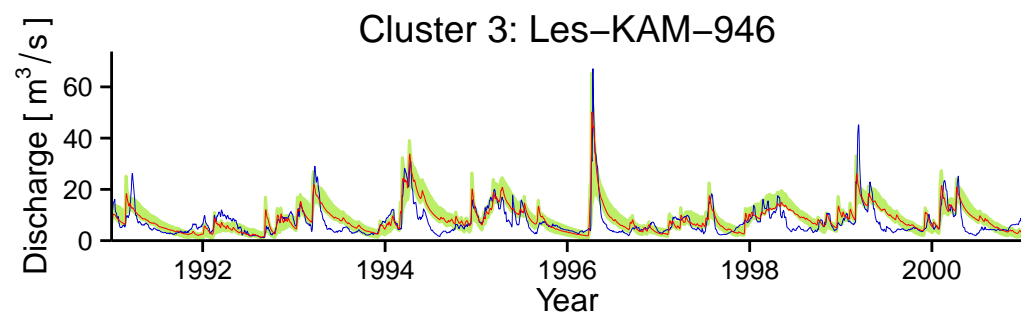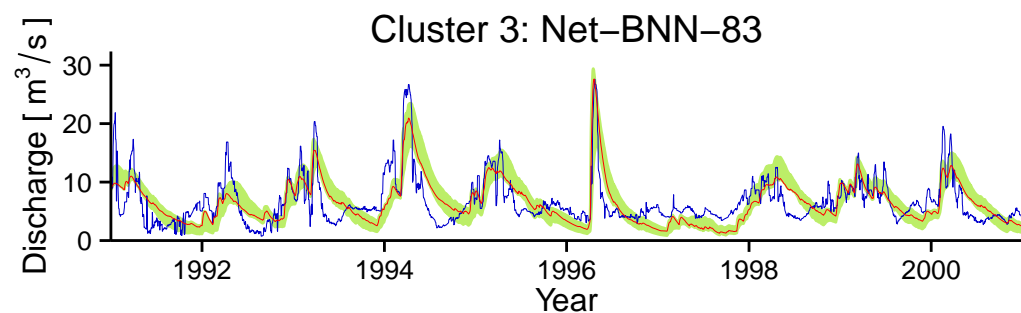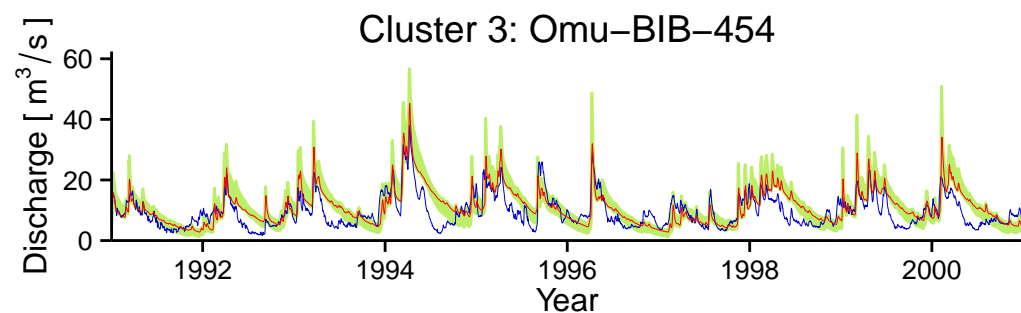

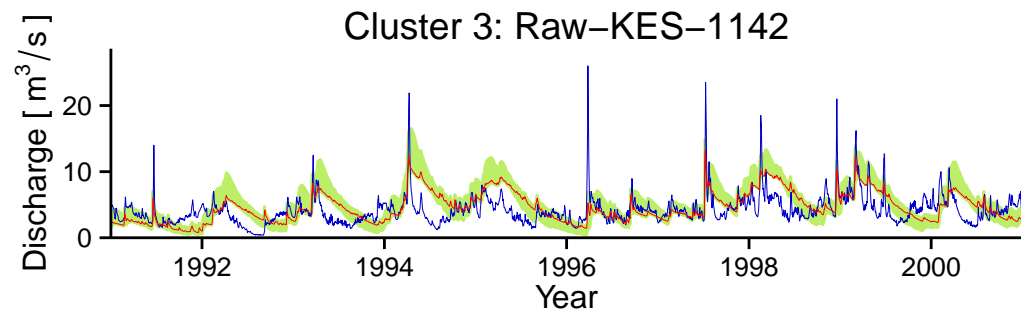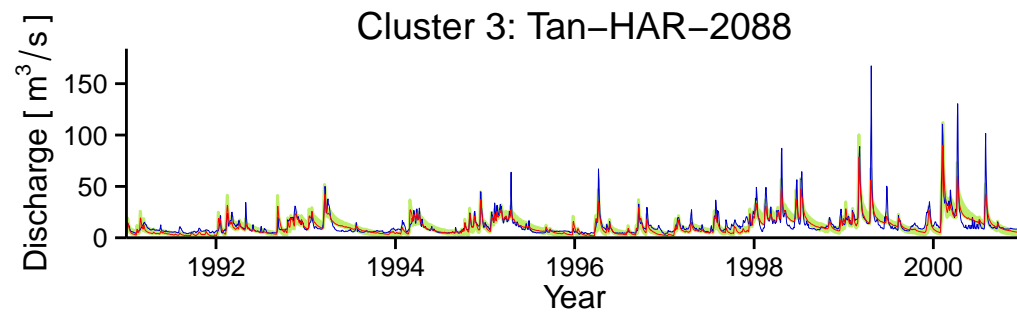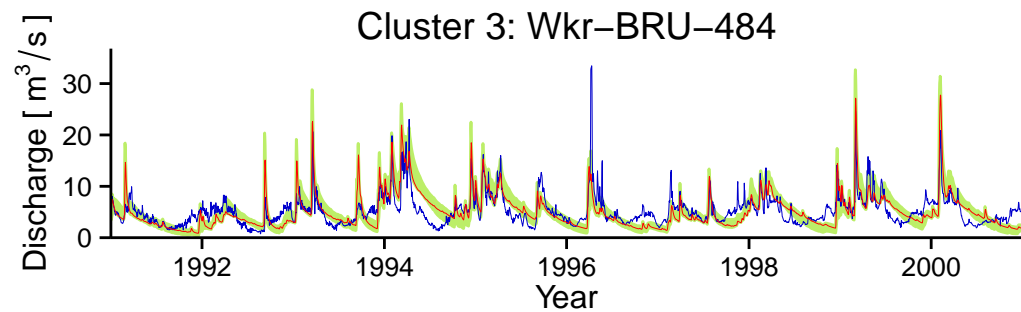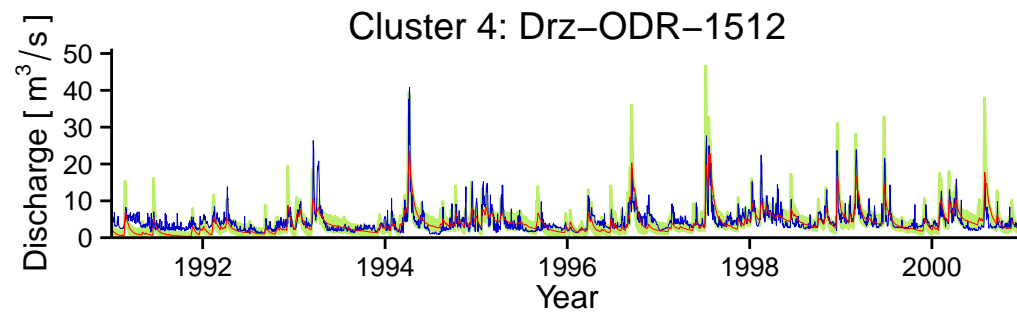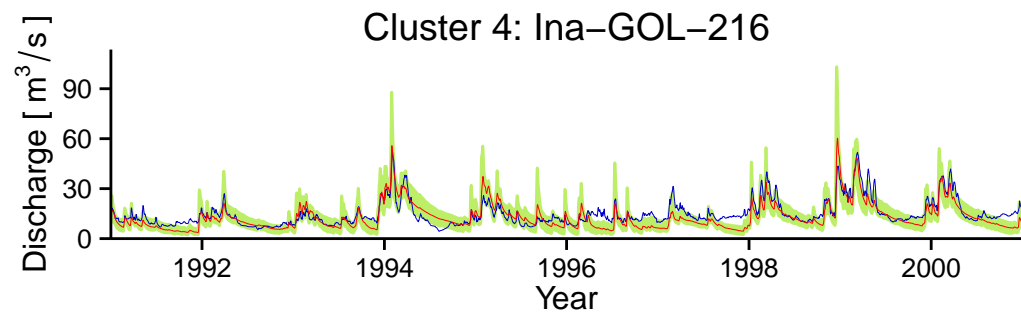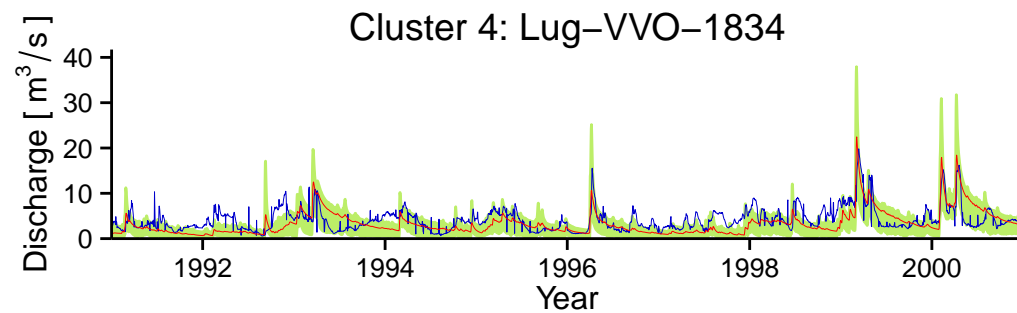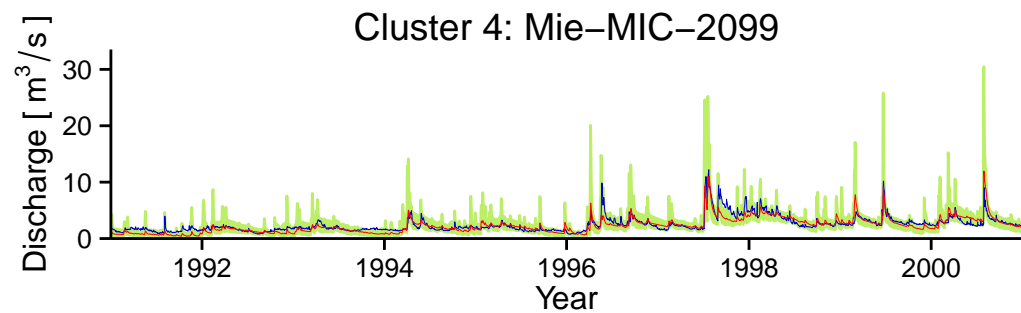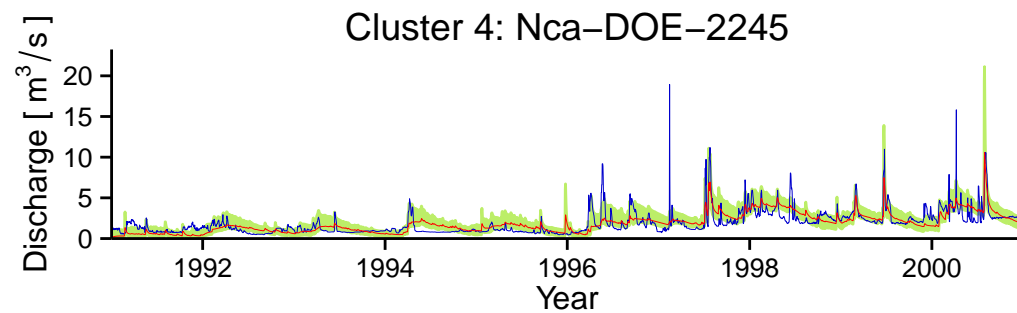

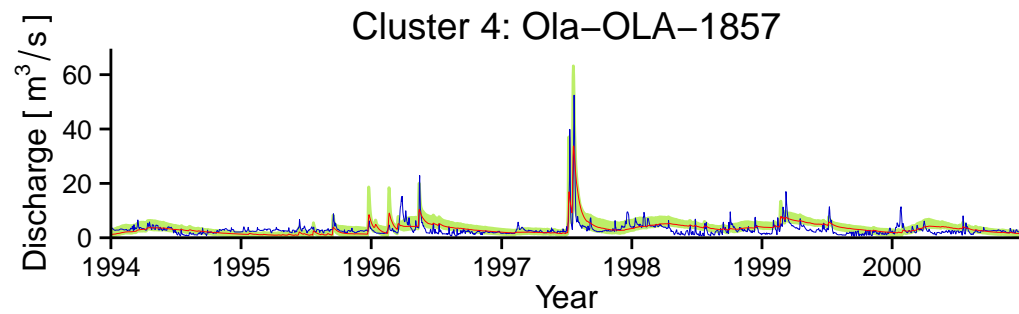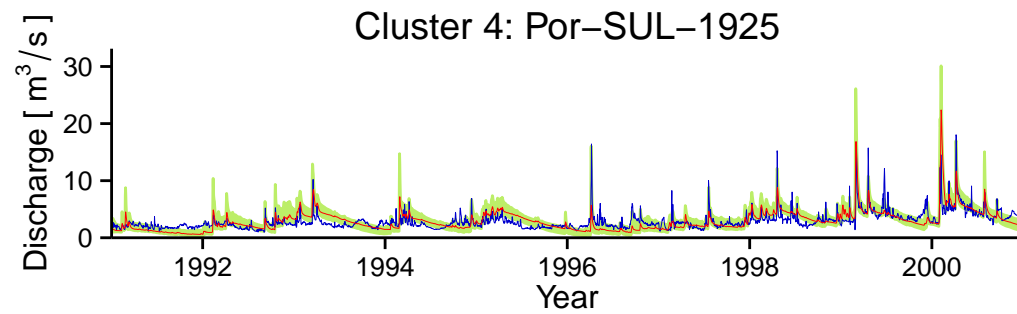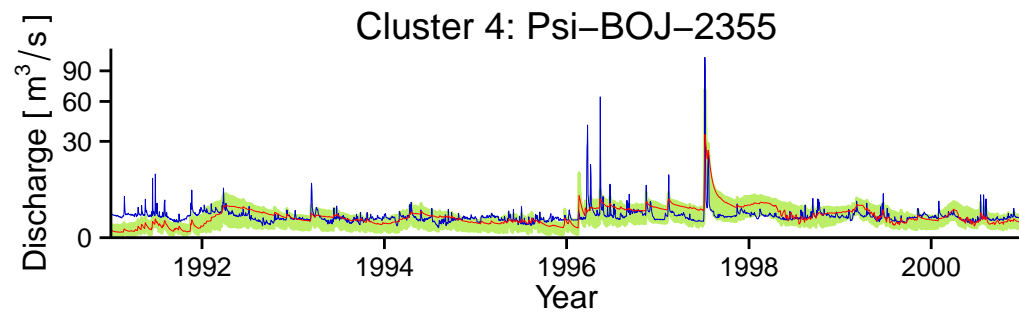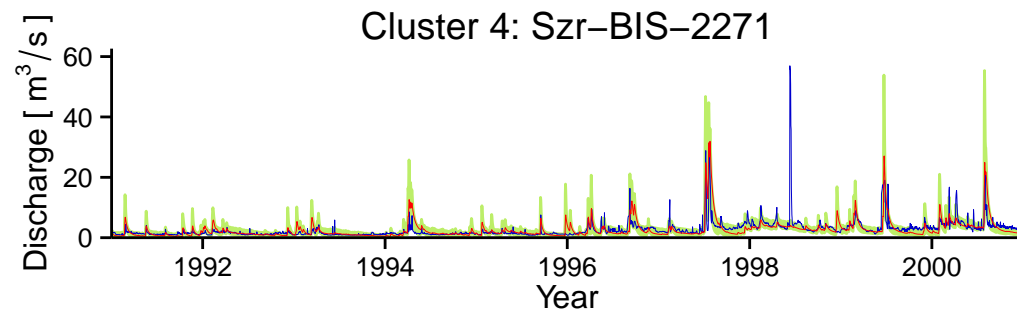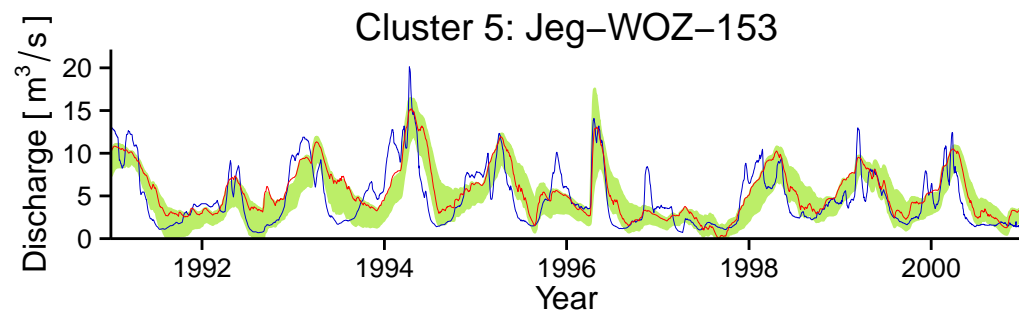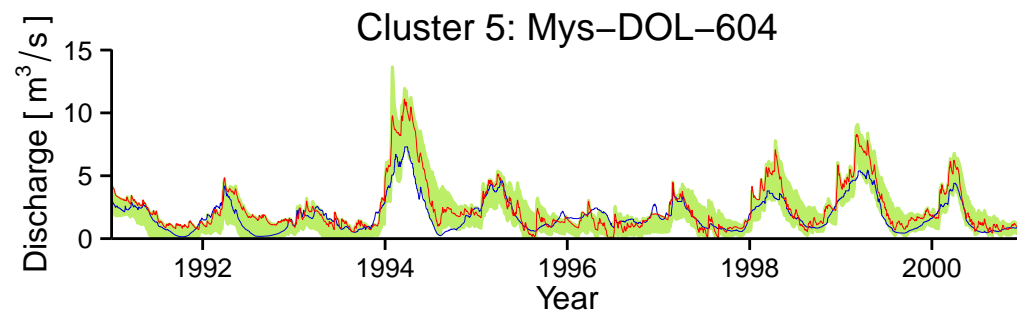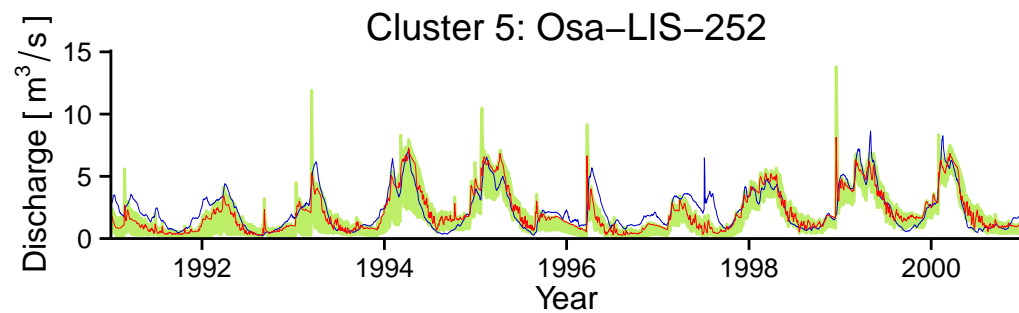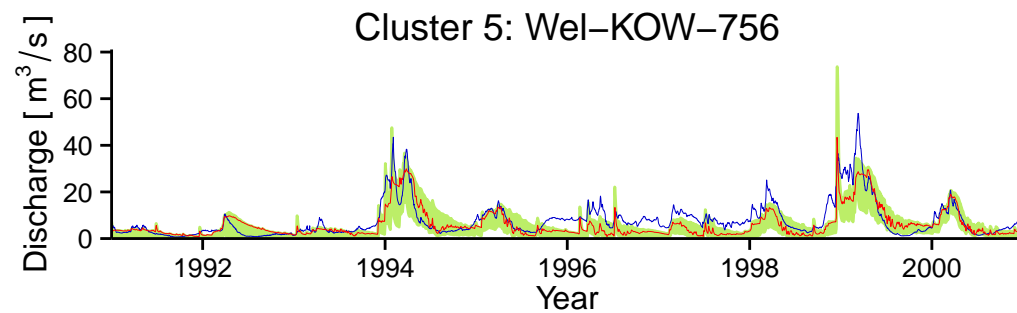

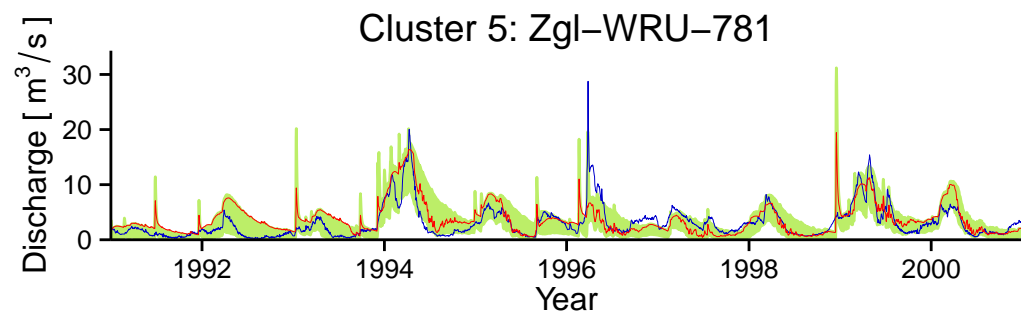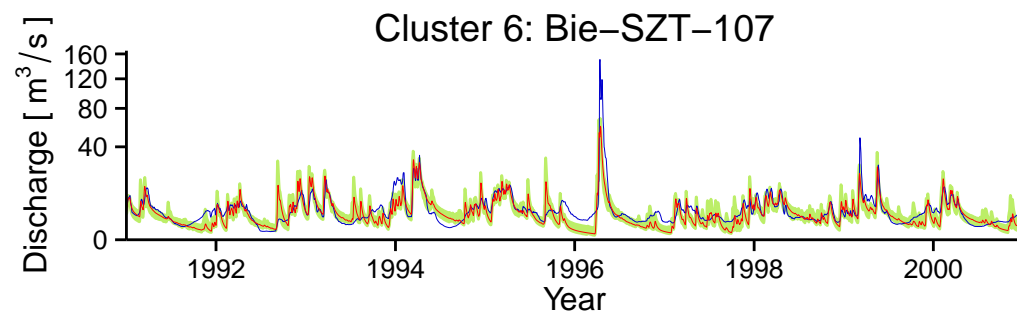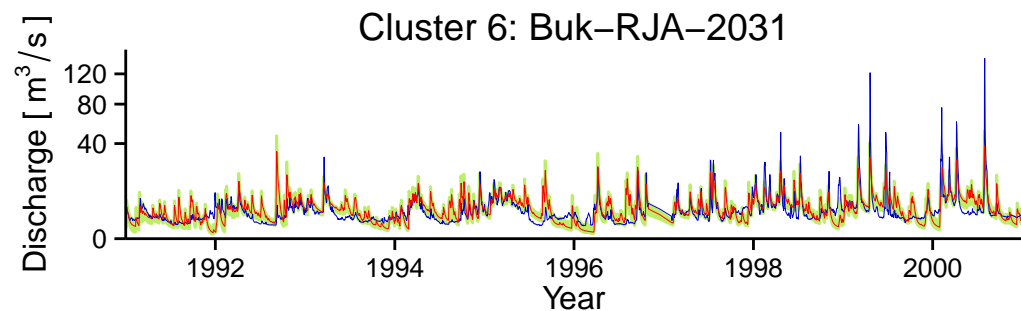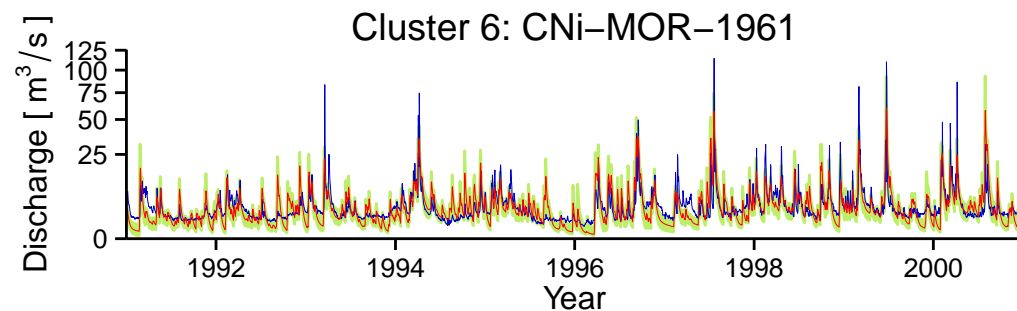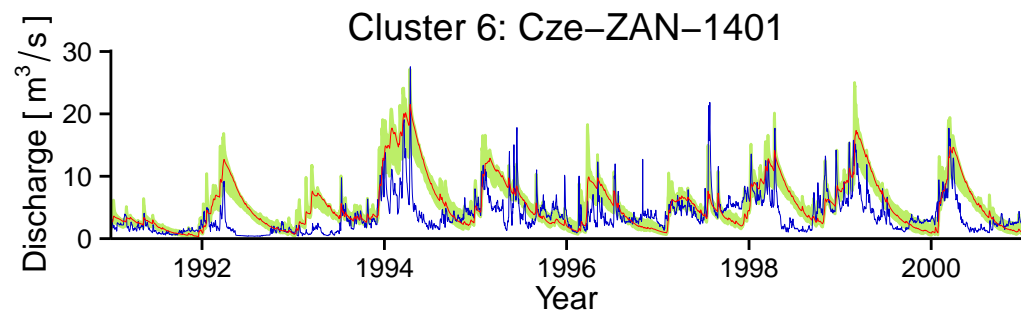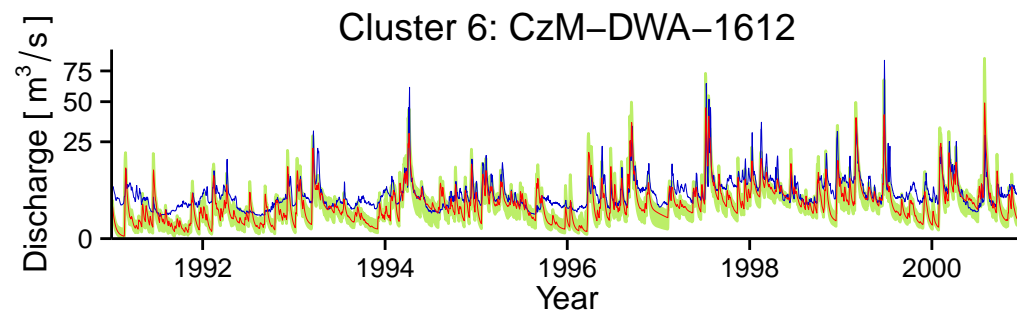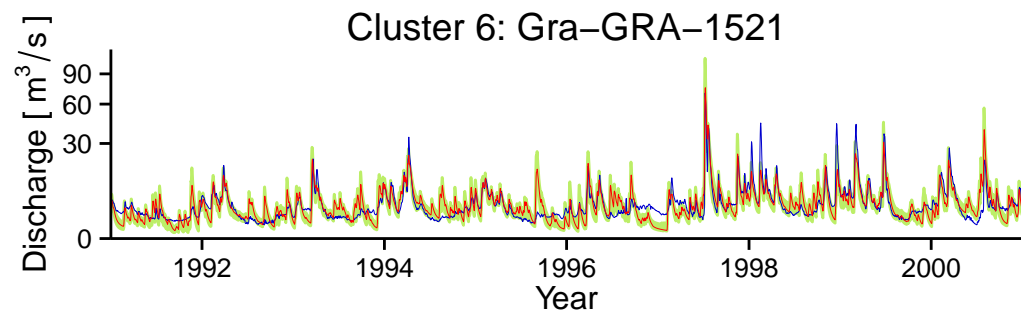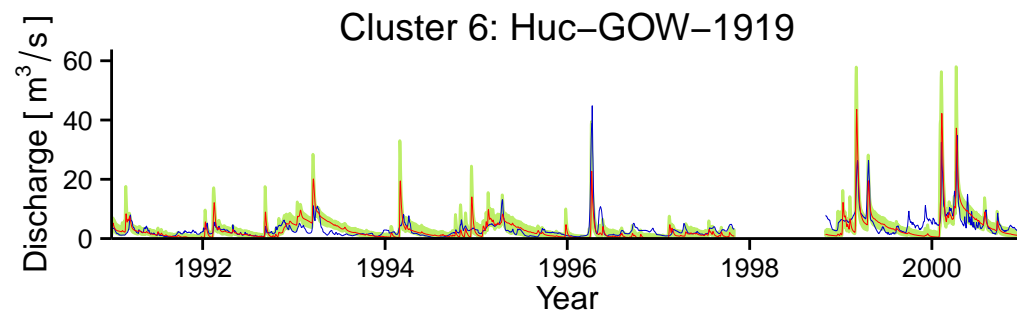

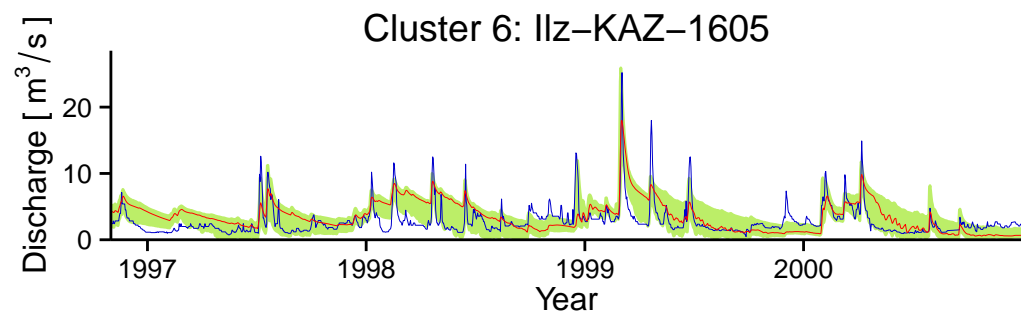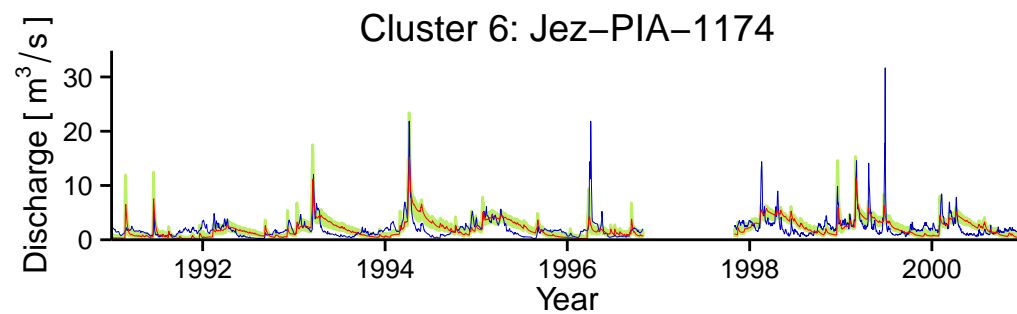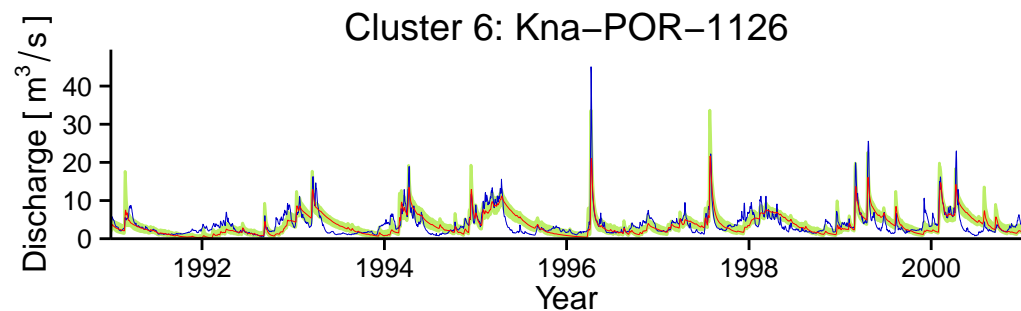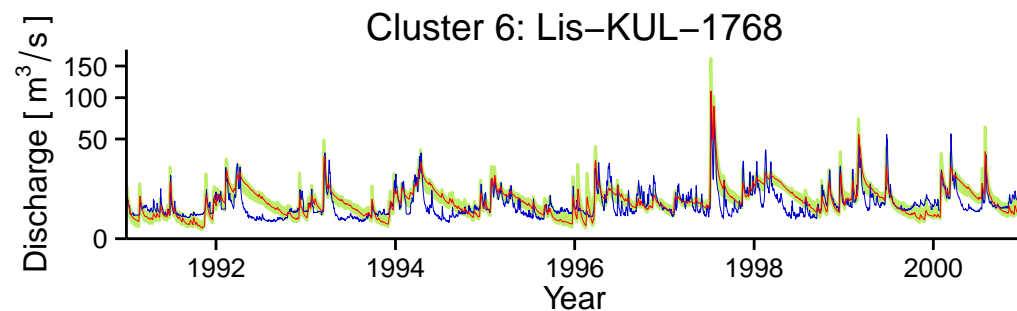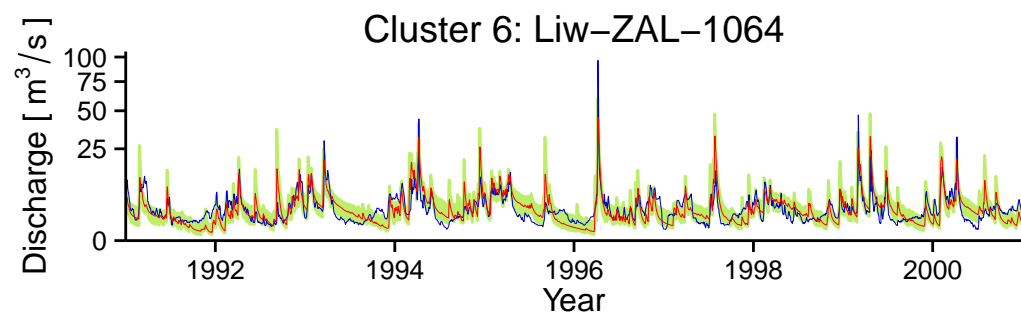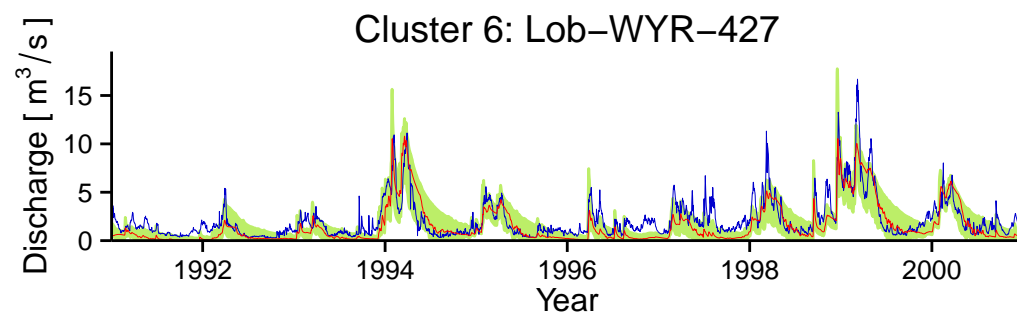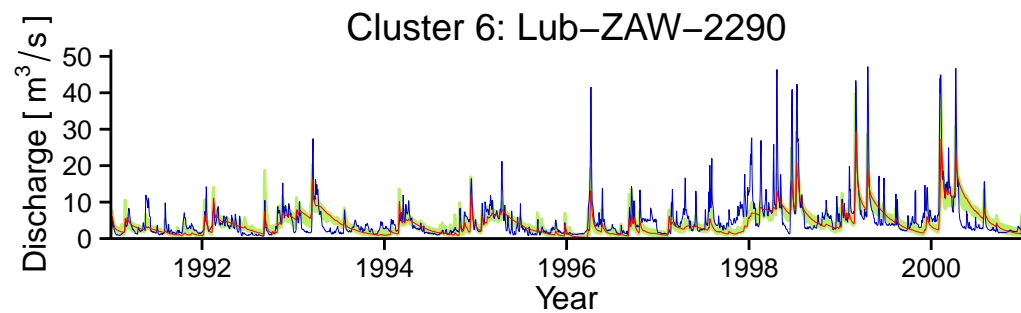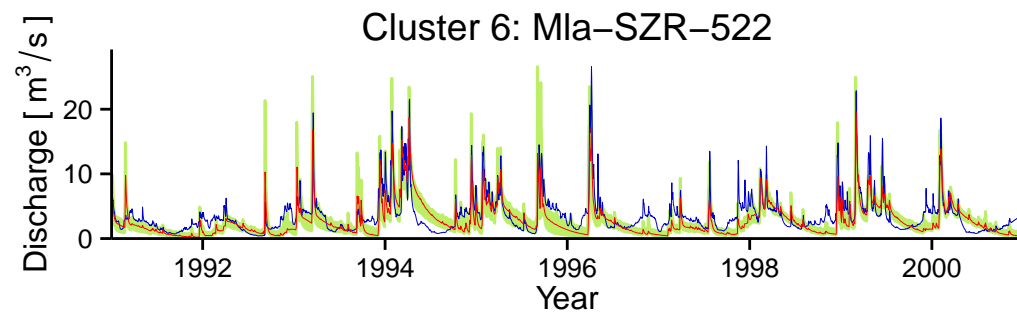



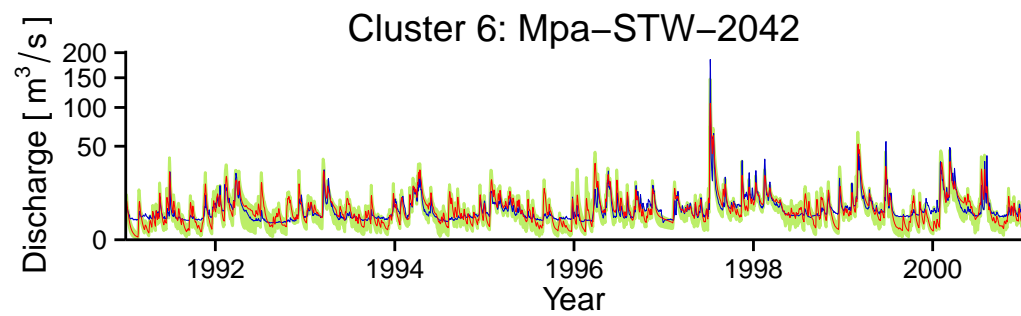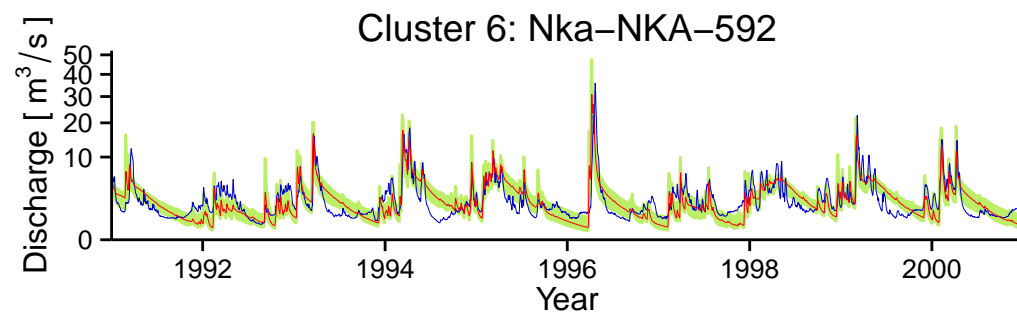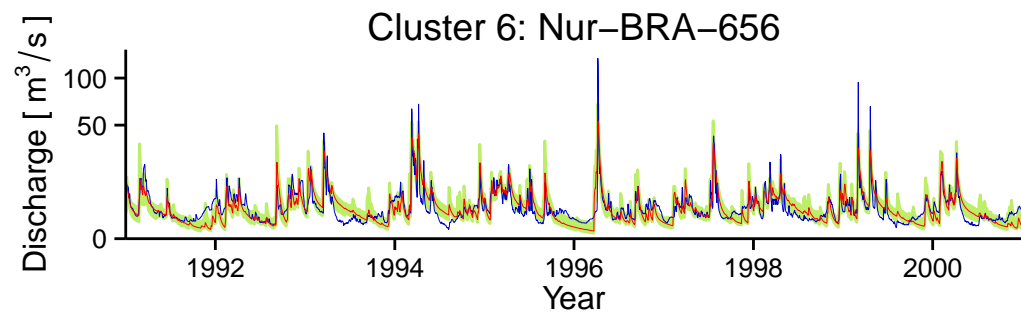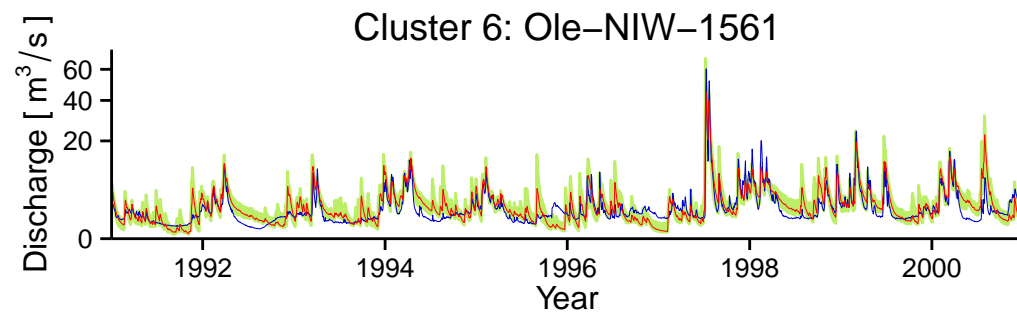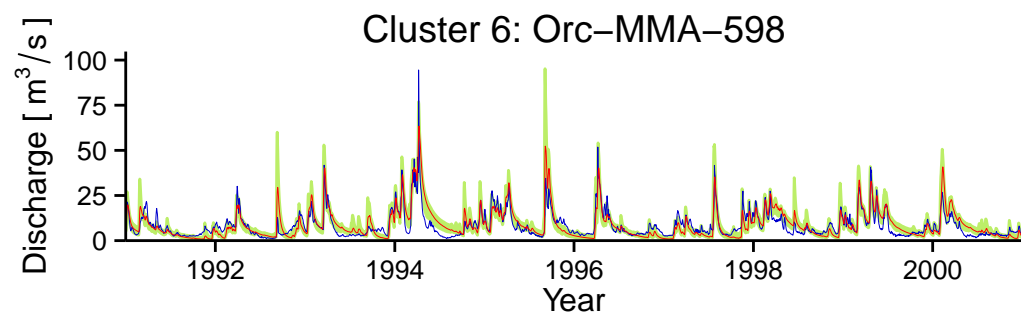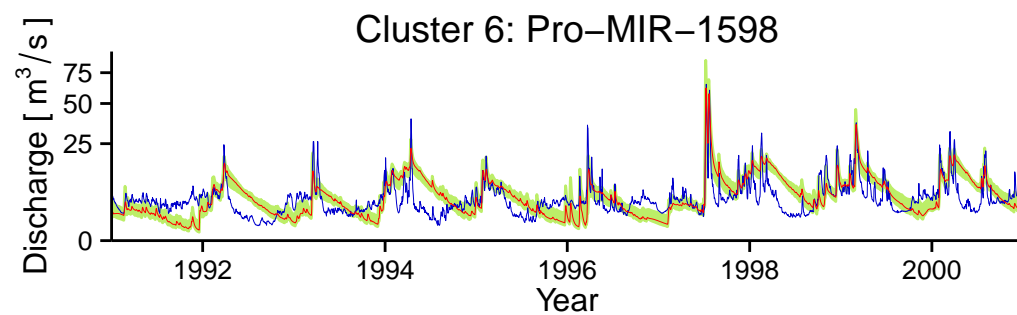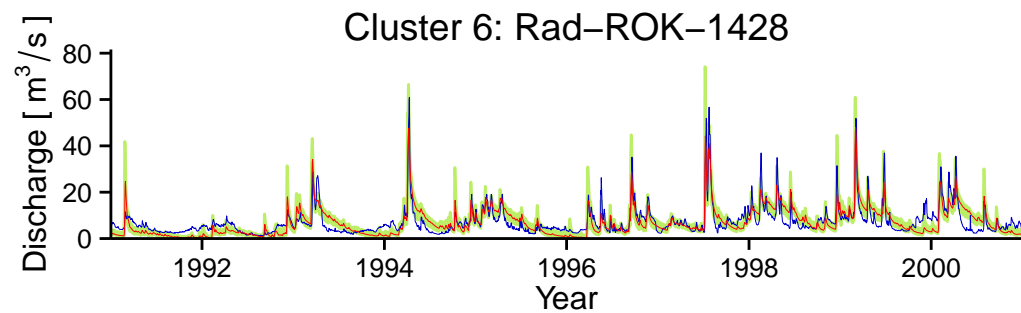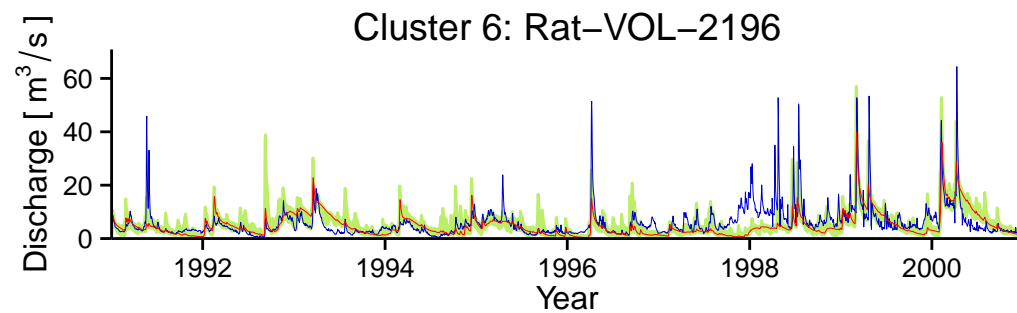

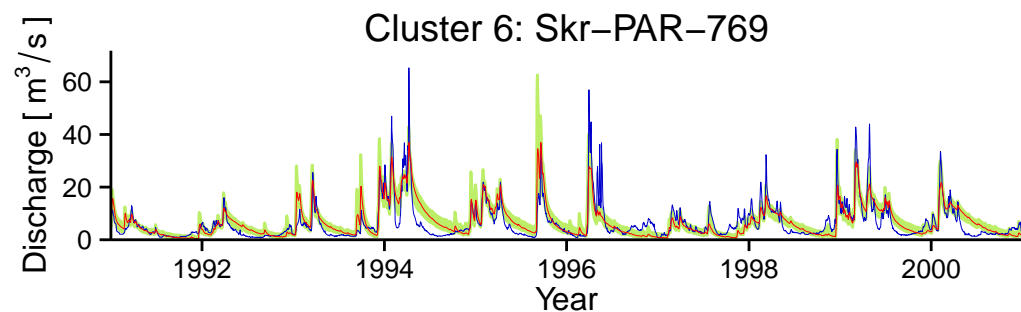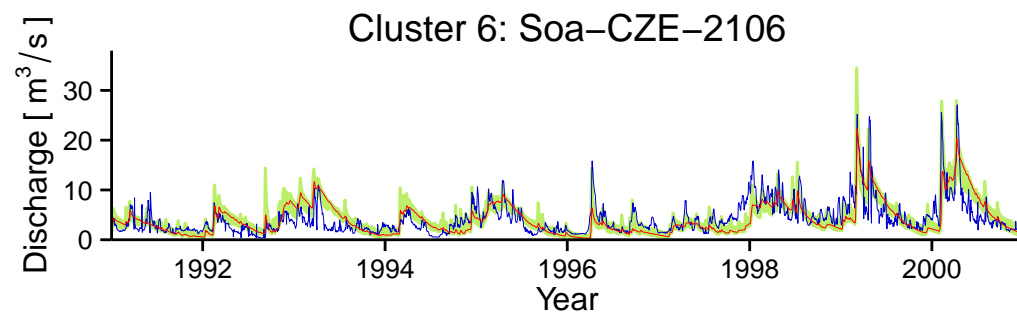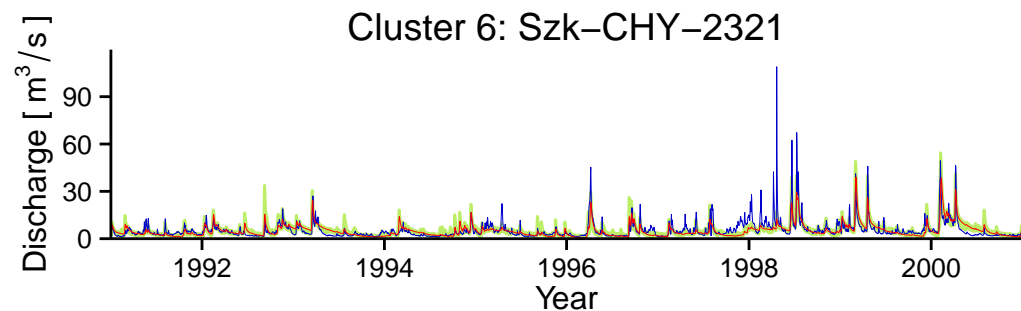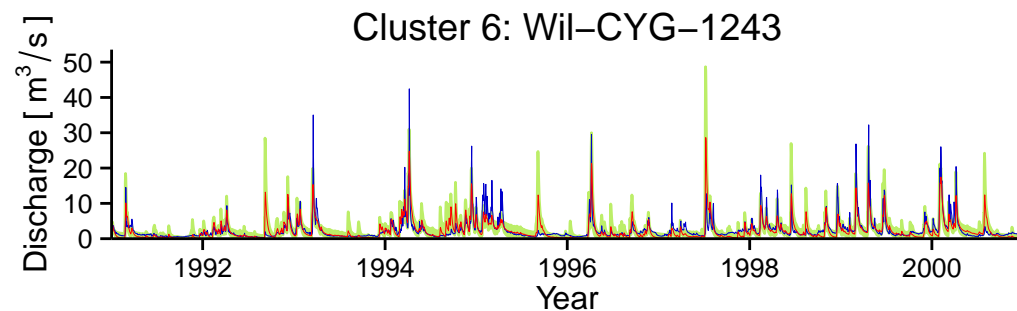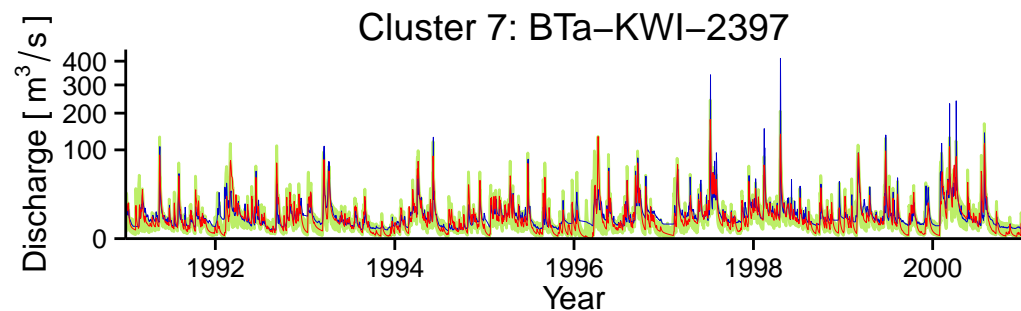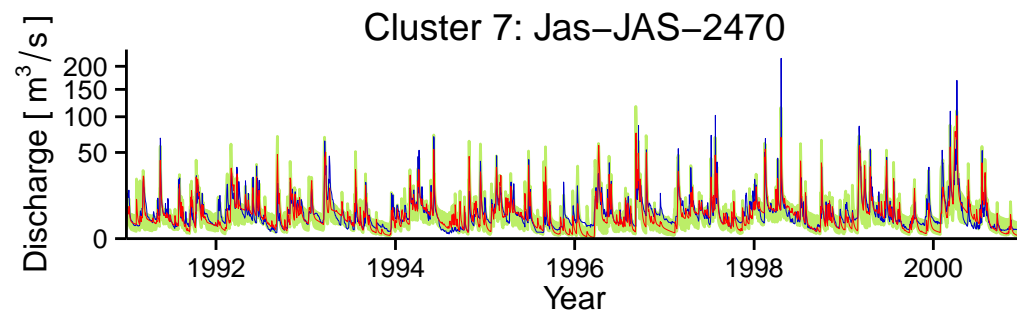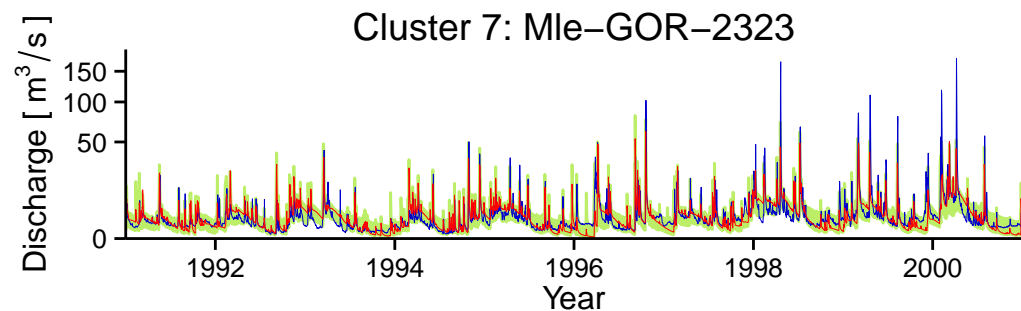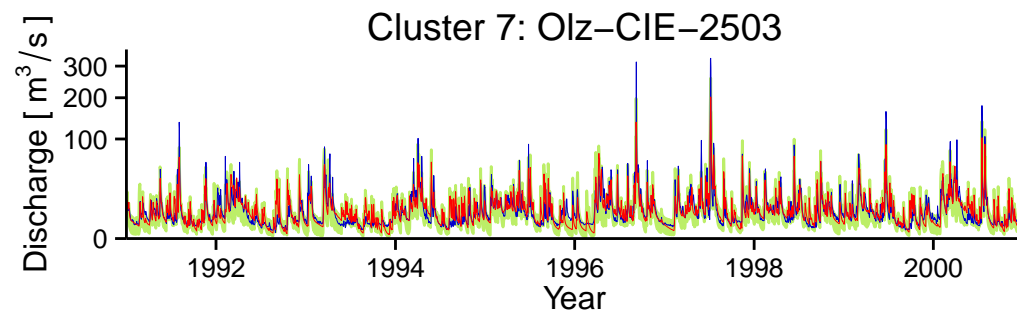



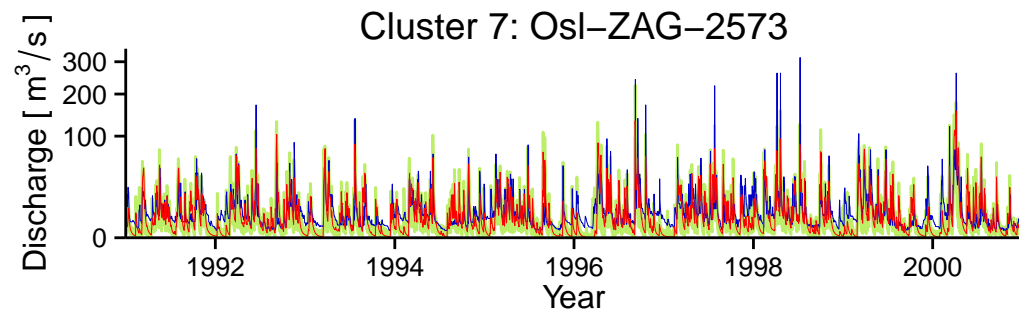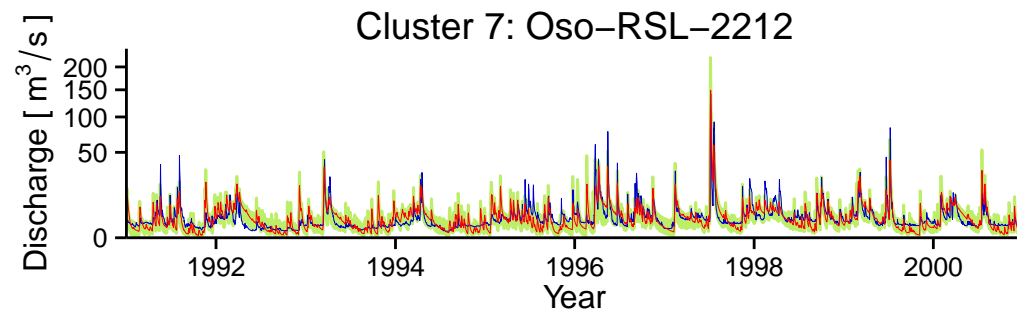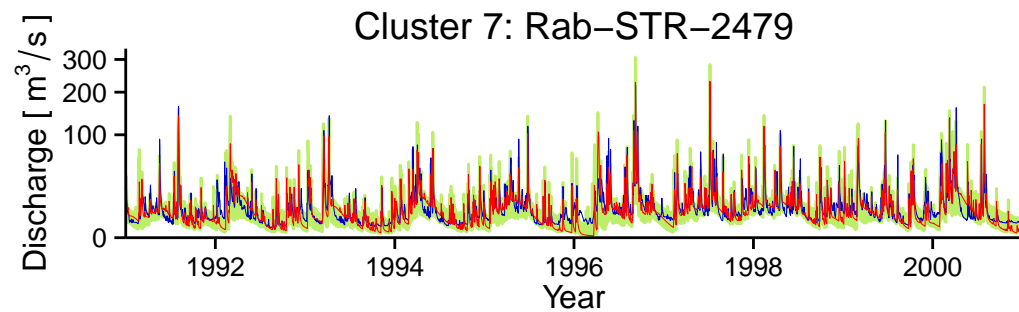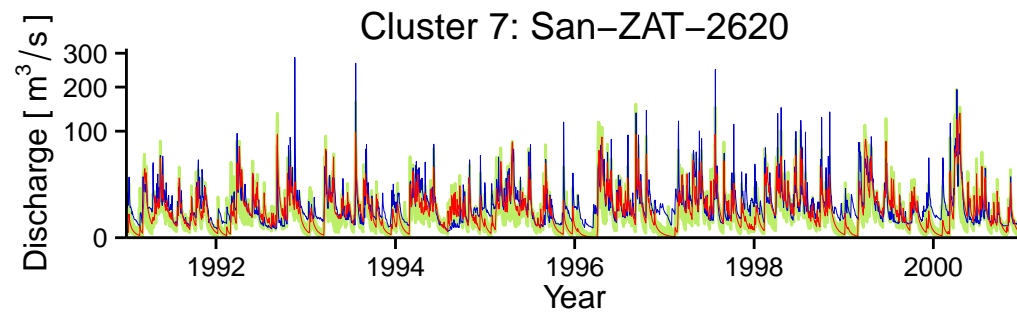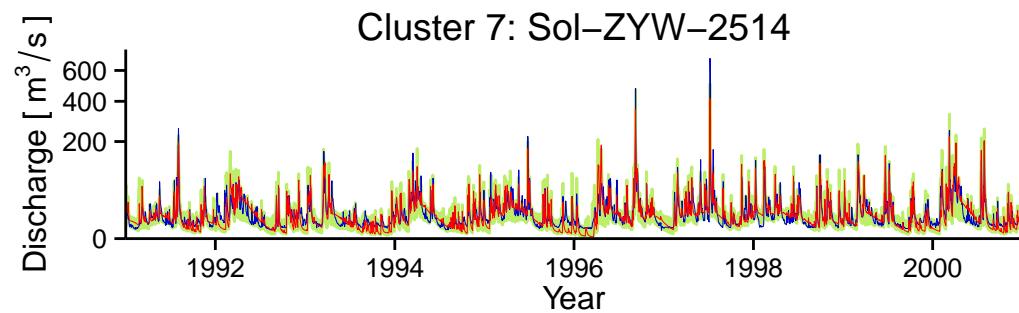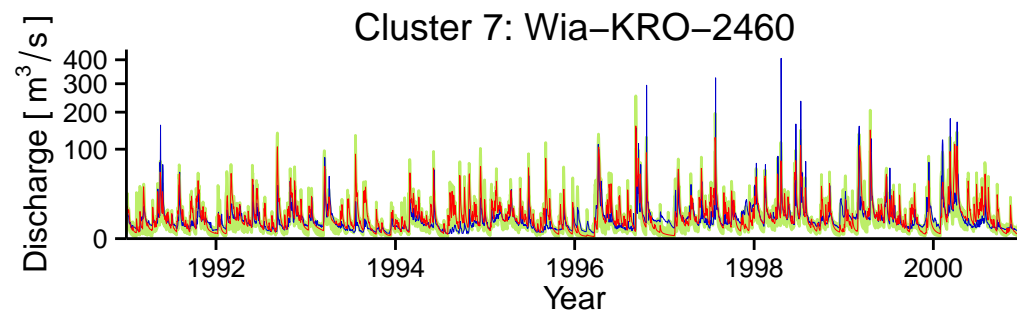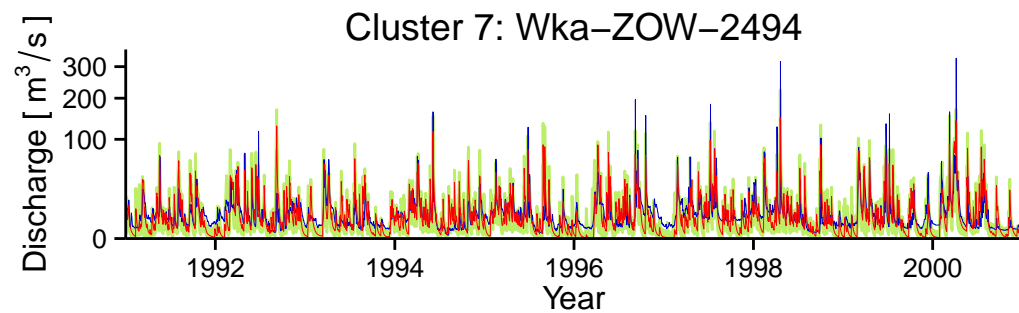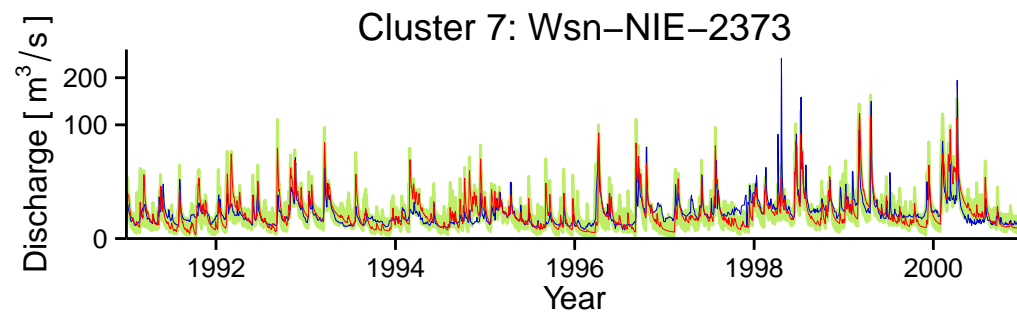

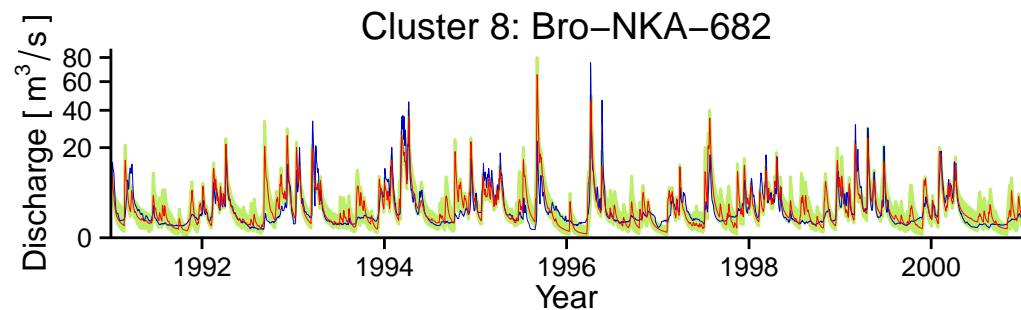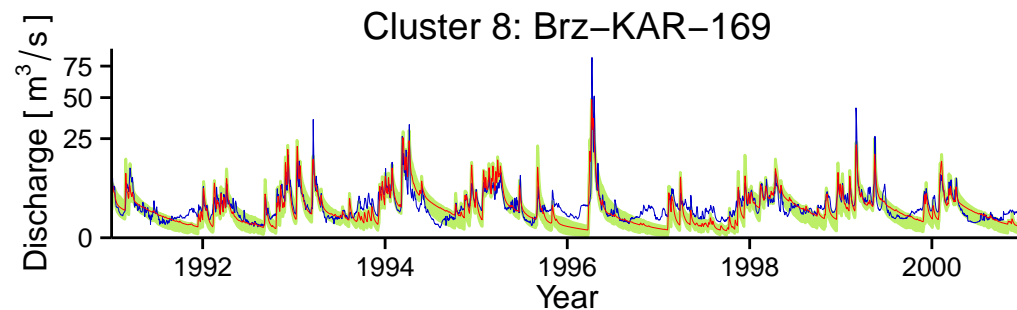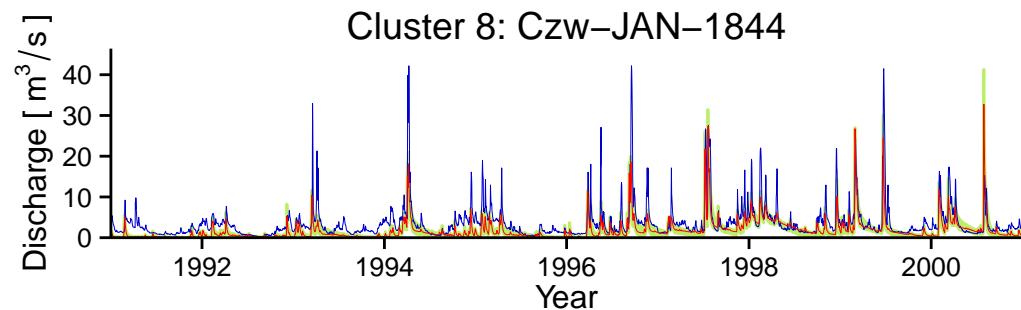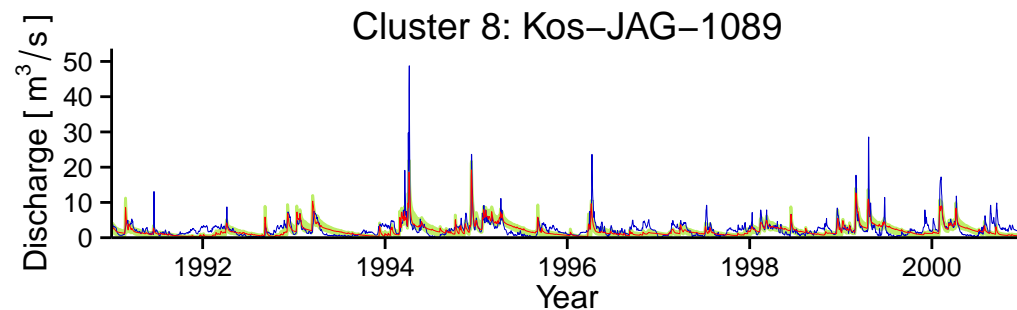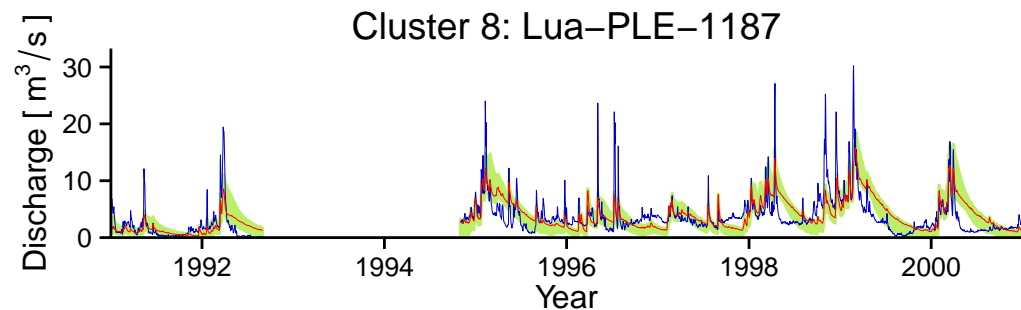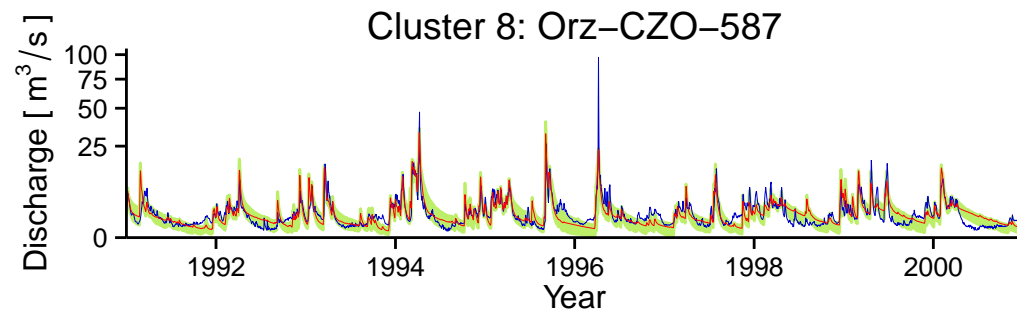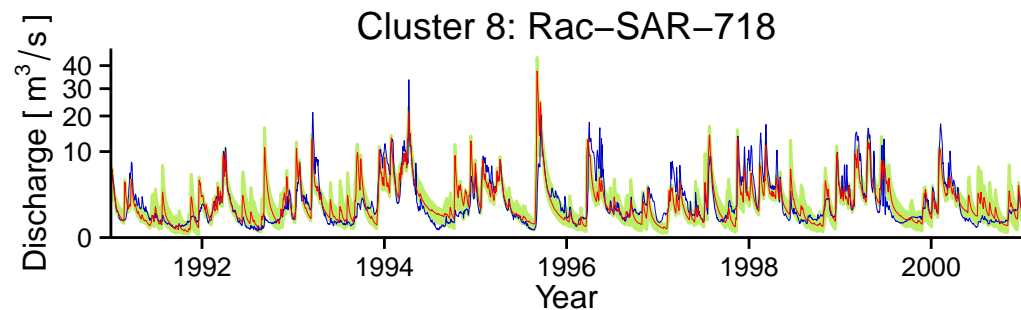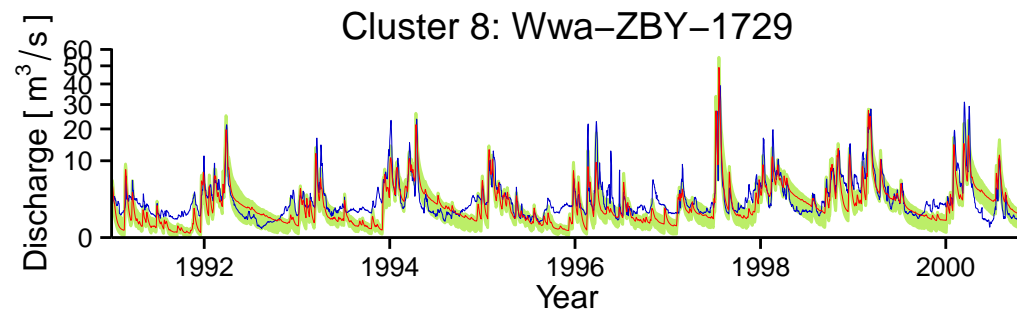

Supplement: Supplementary file 1 [file 2]

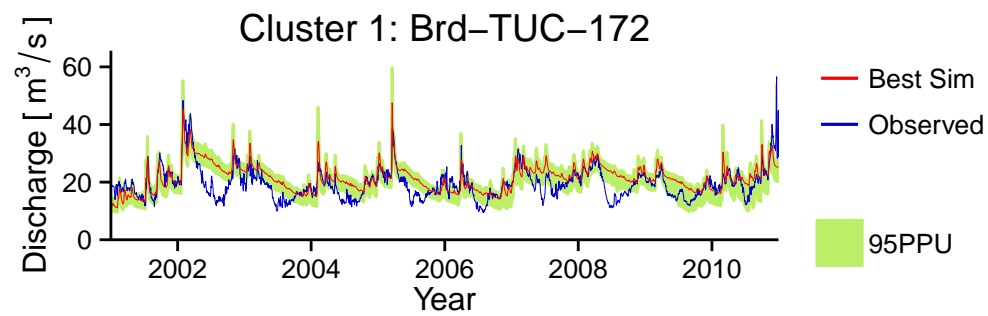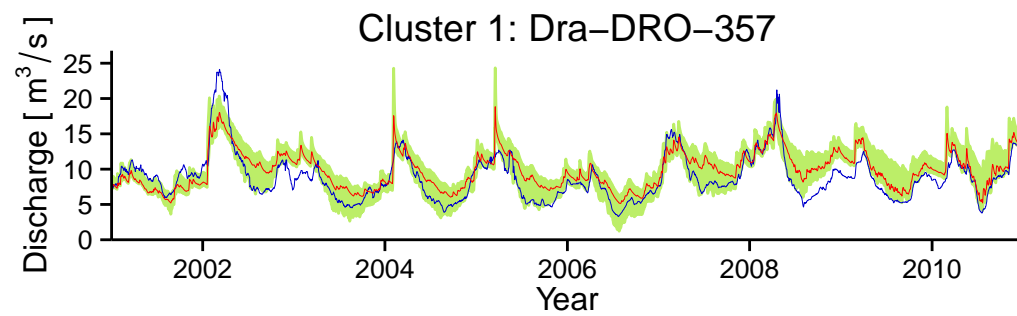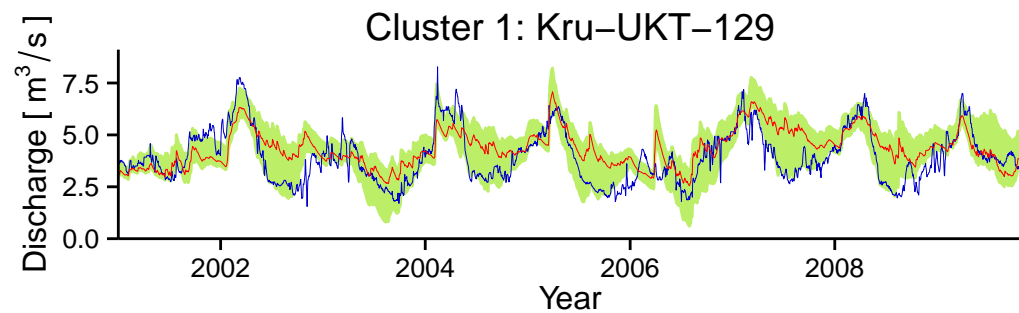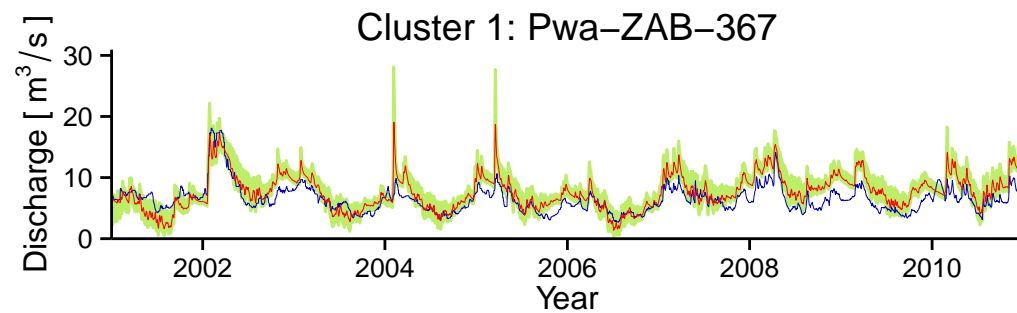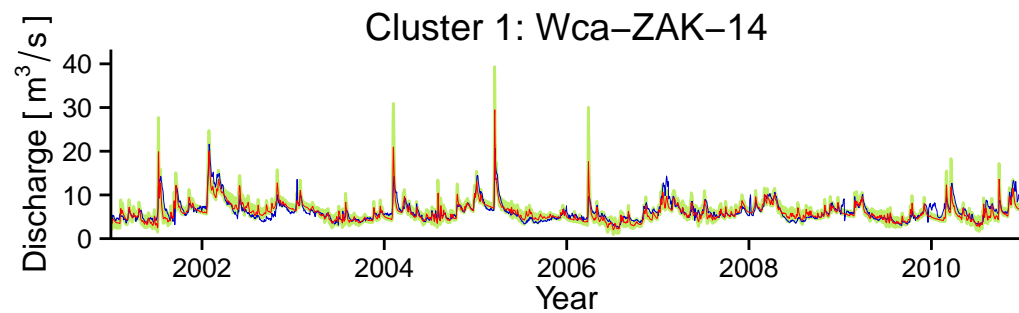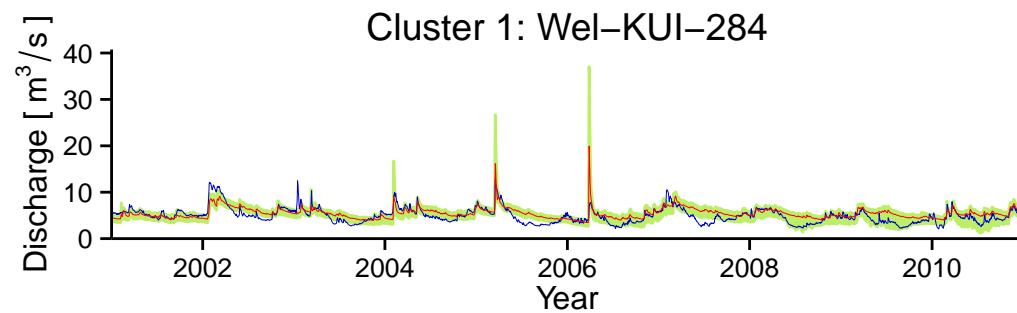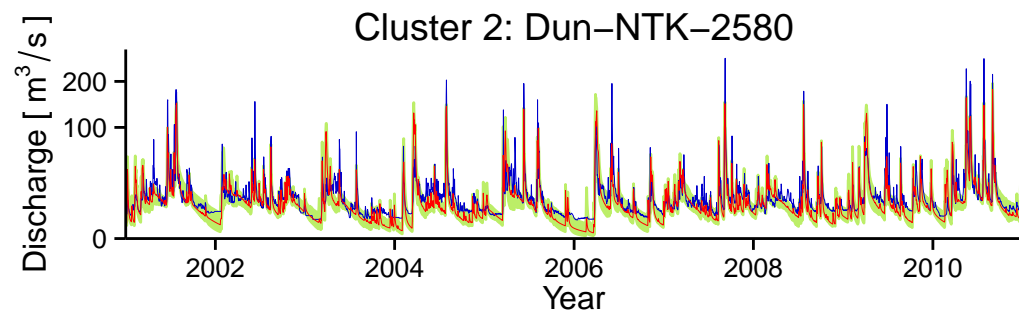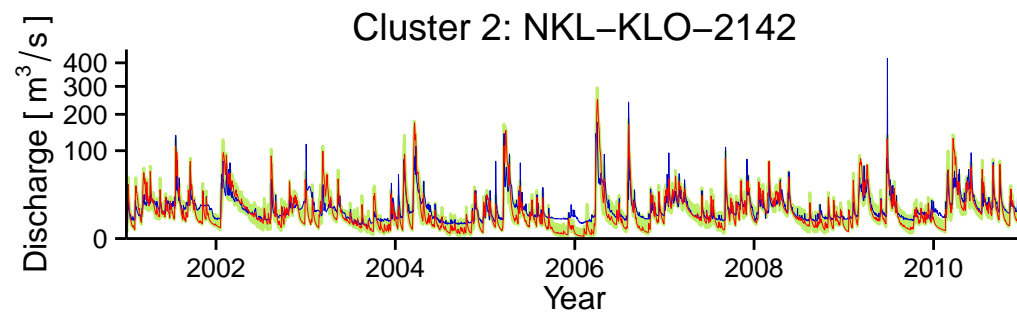

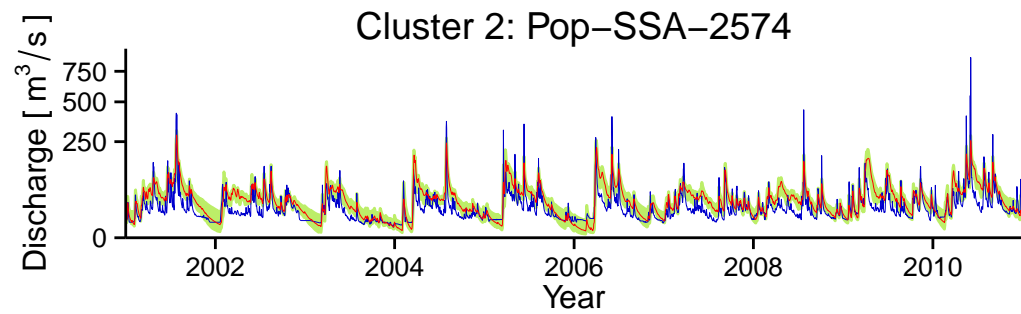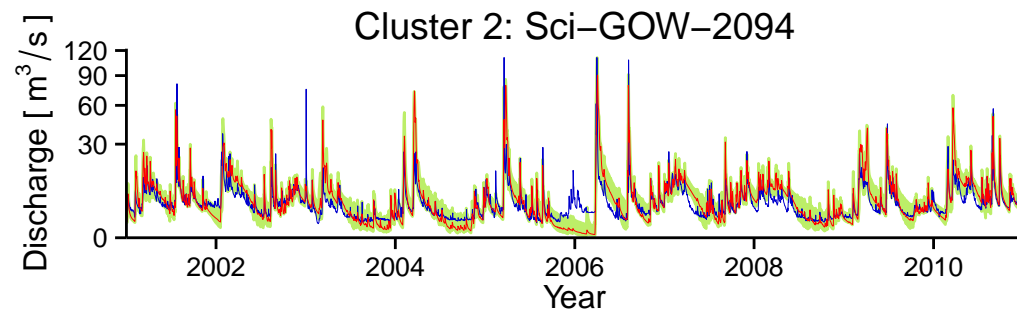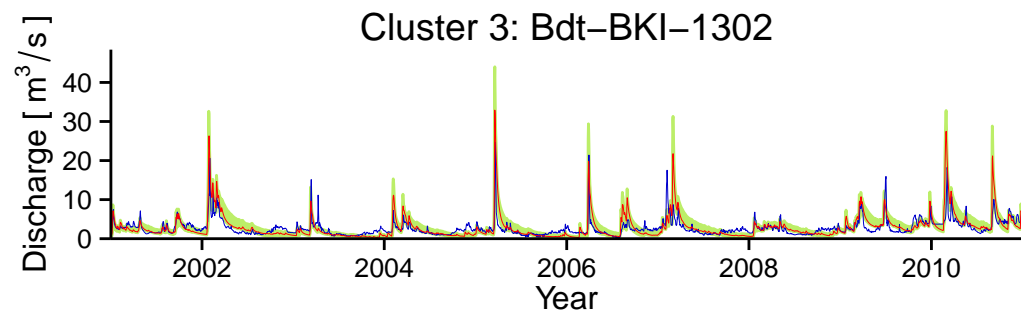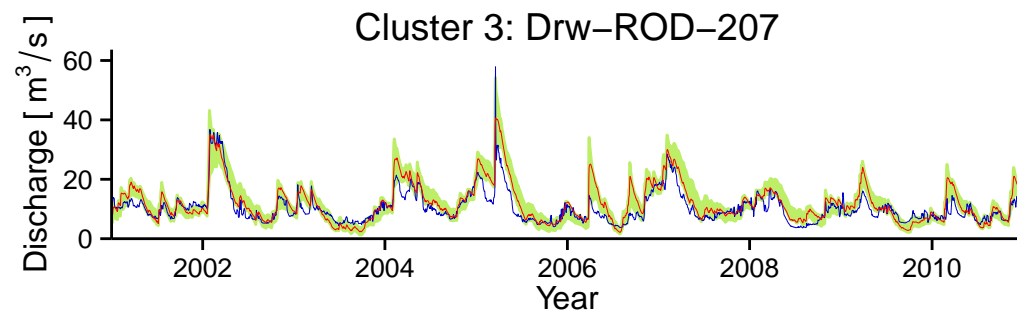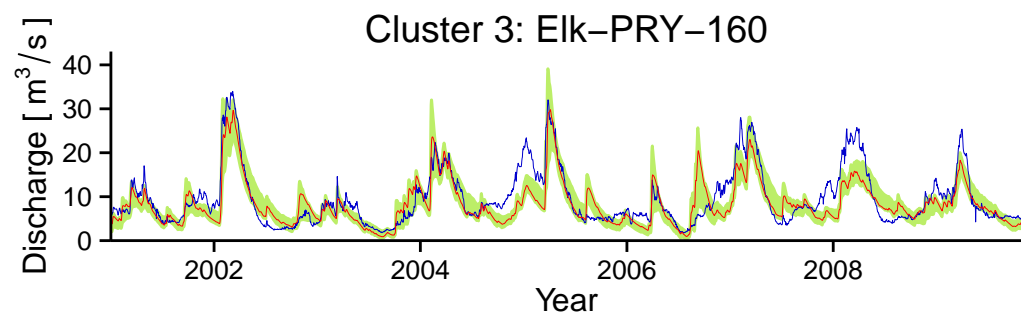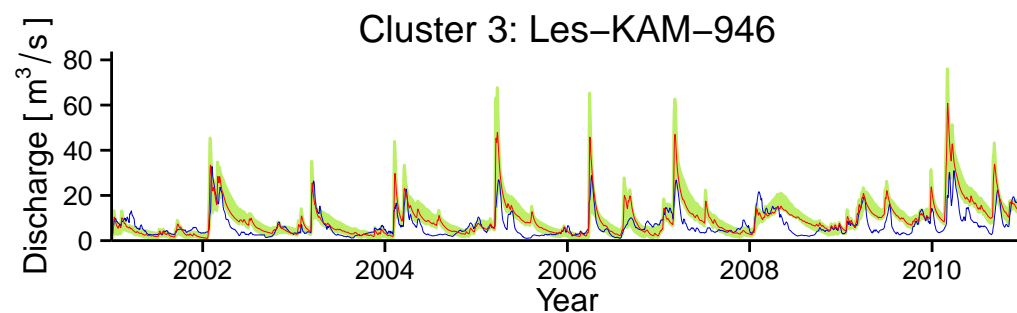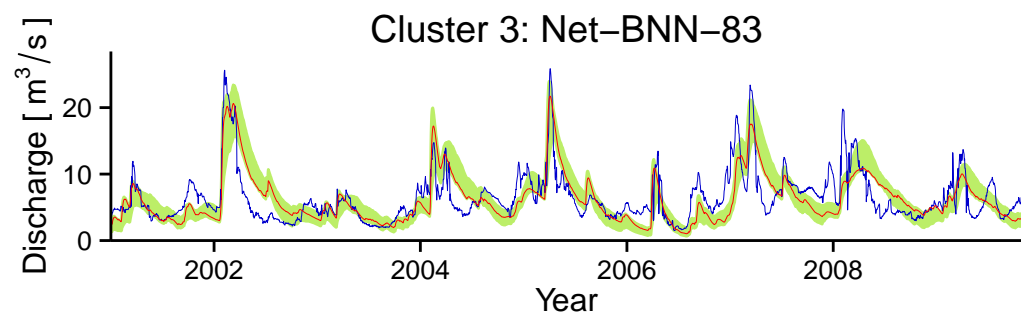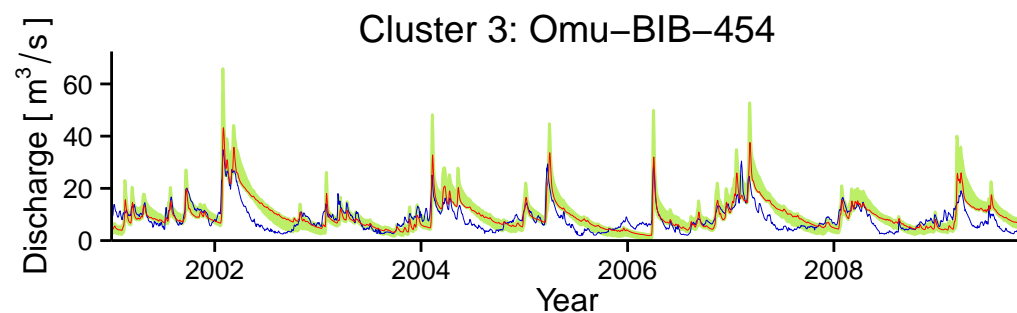

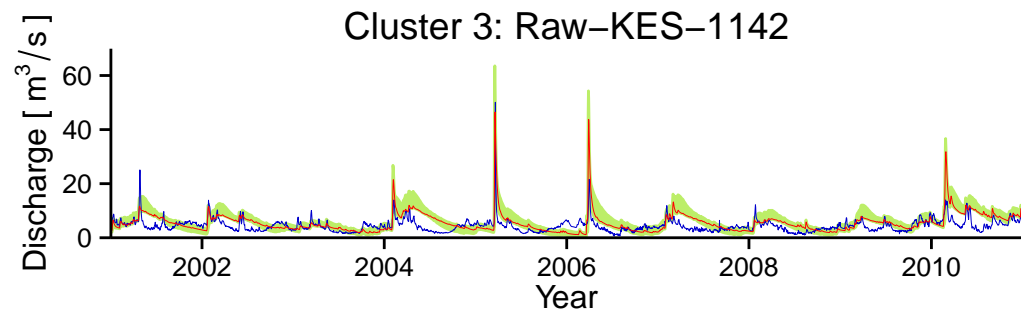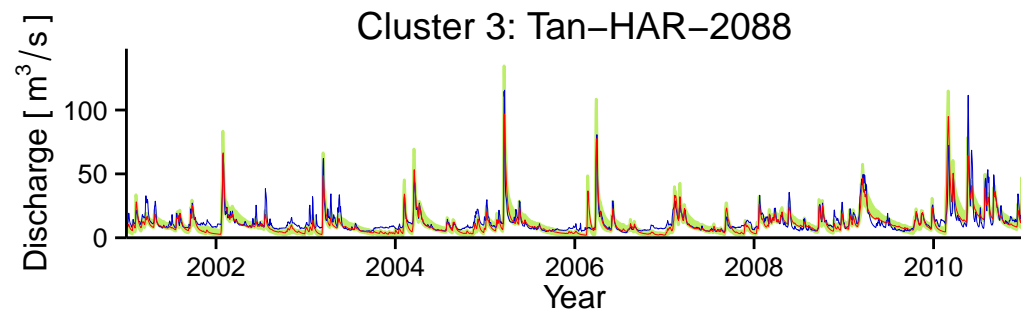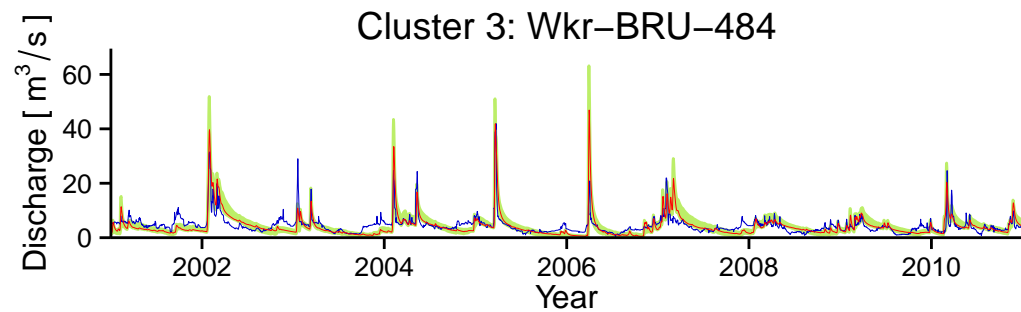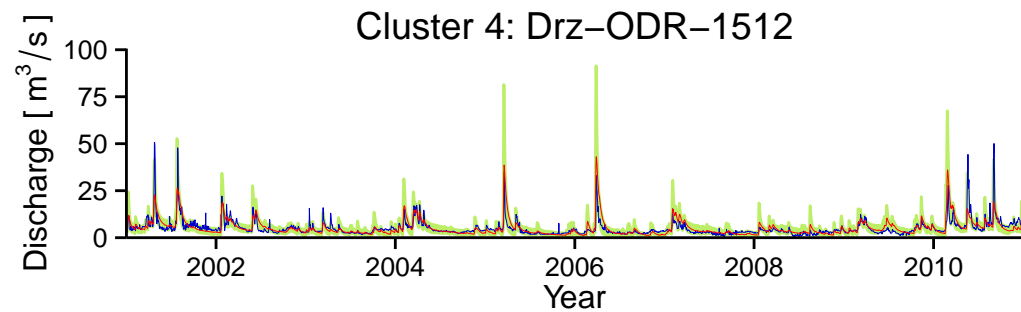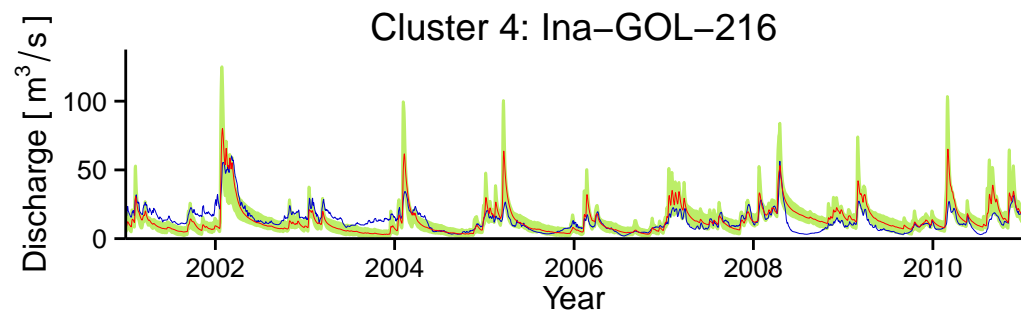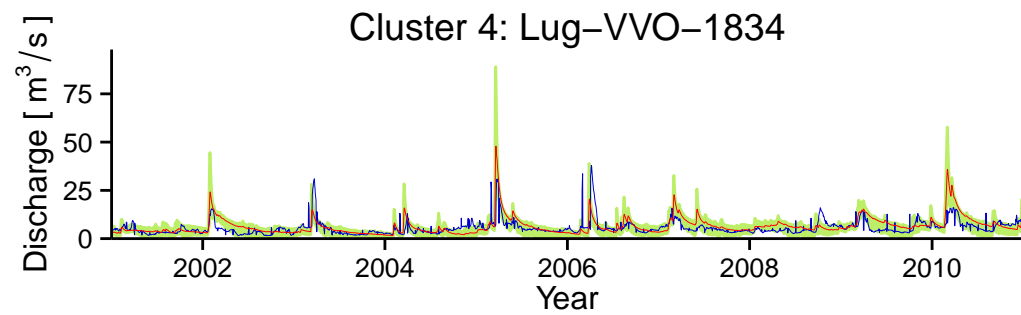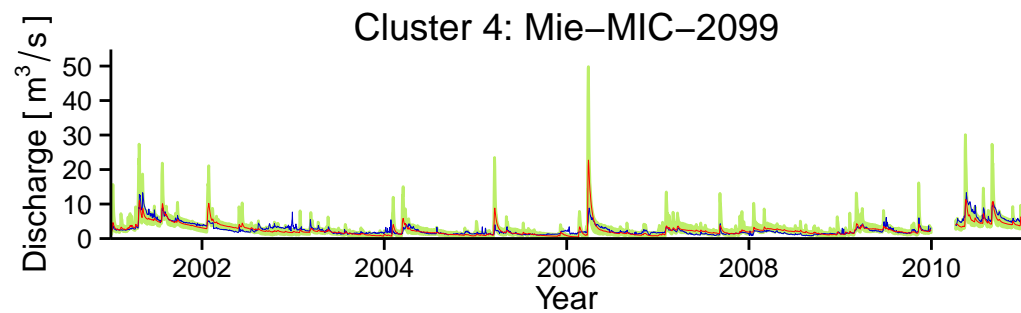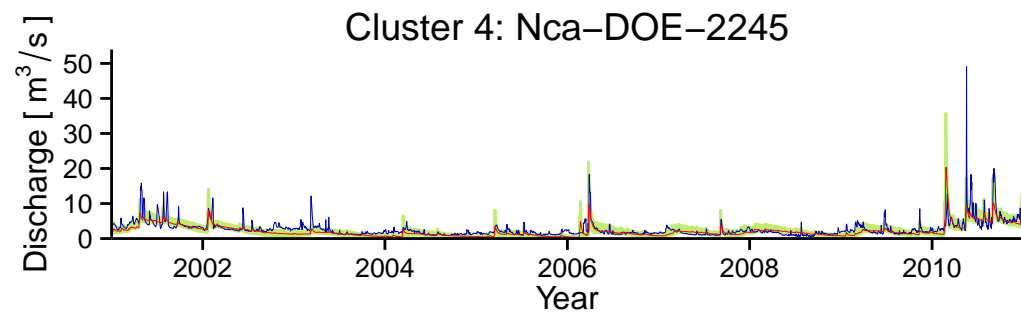

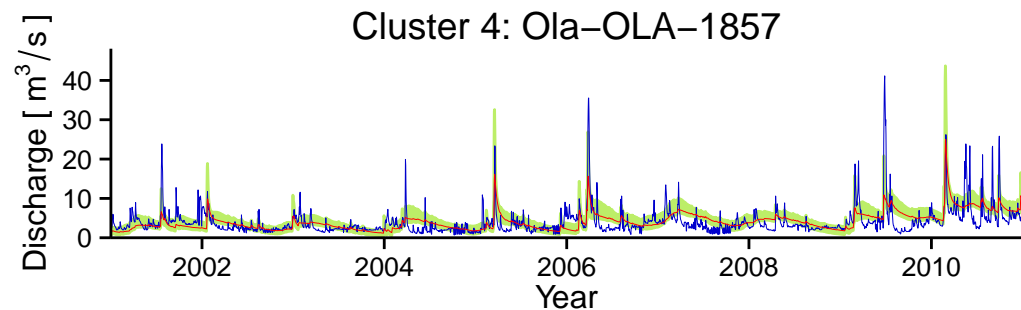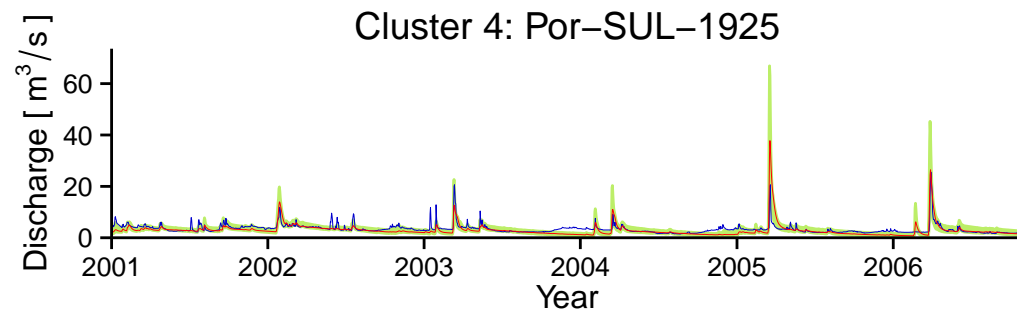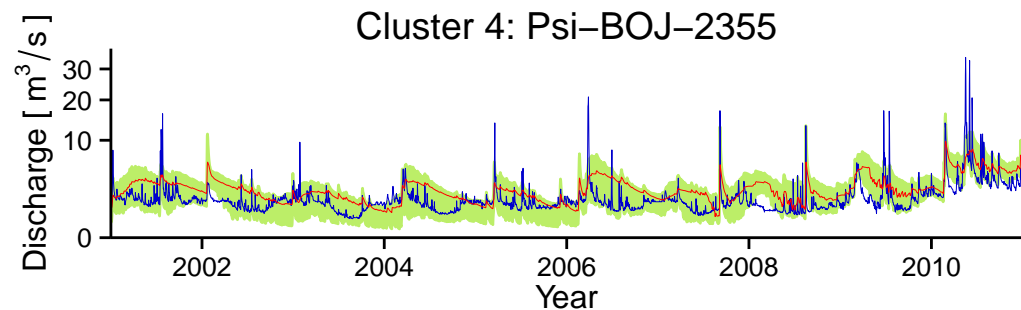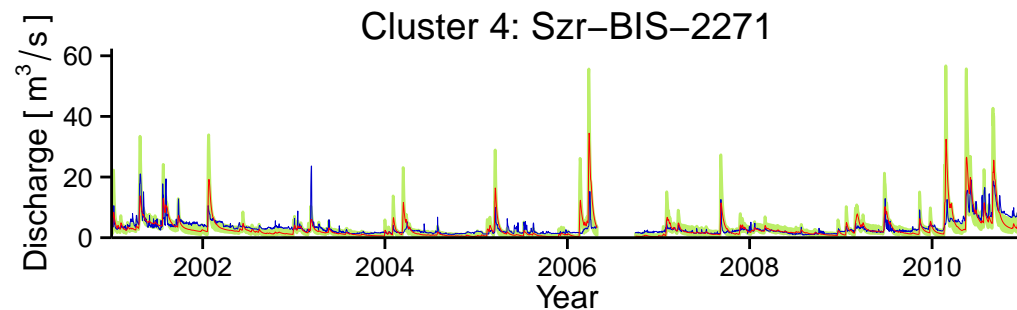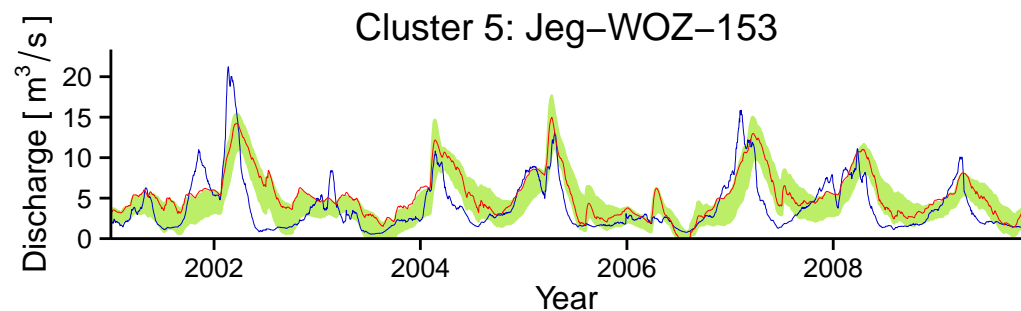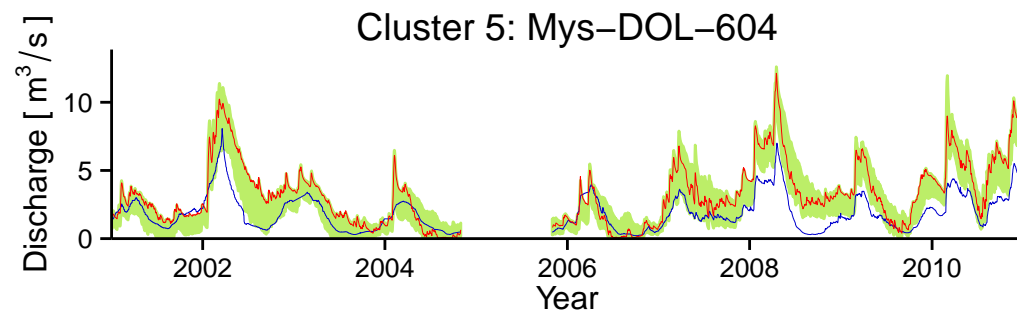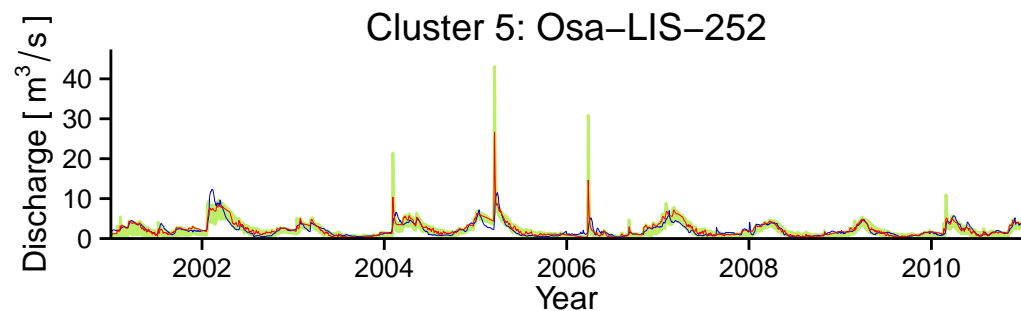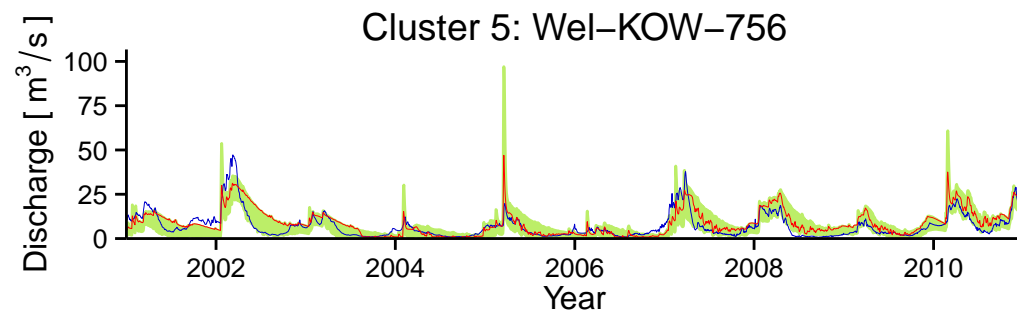

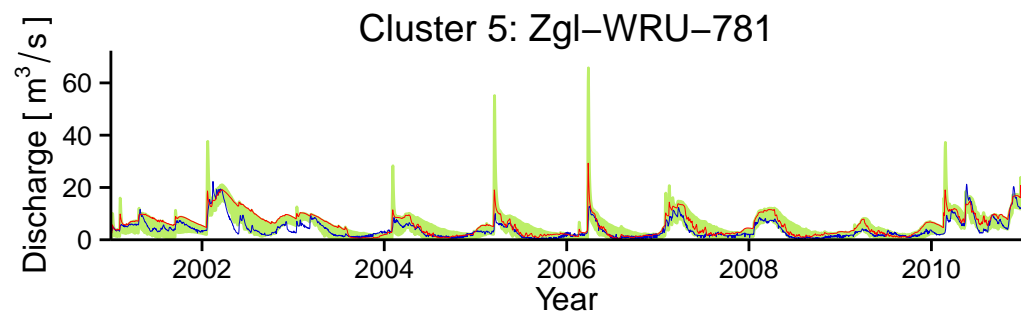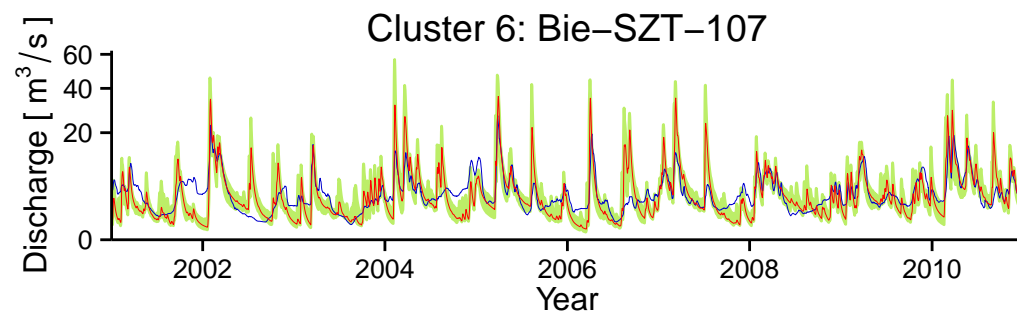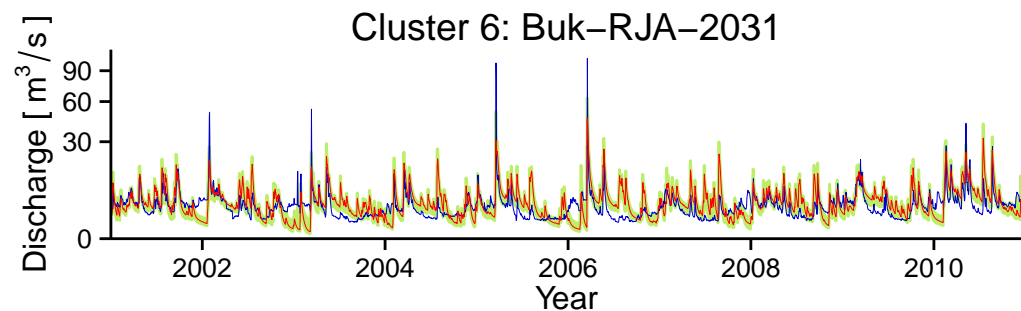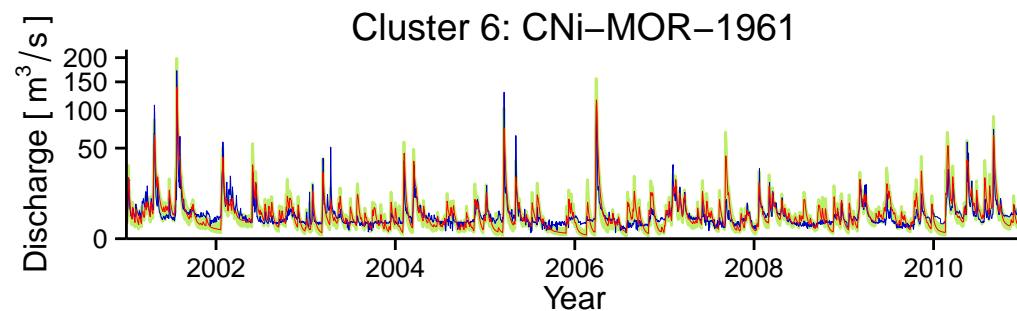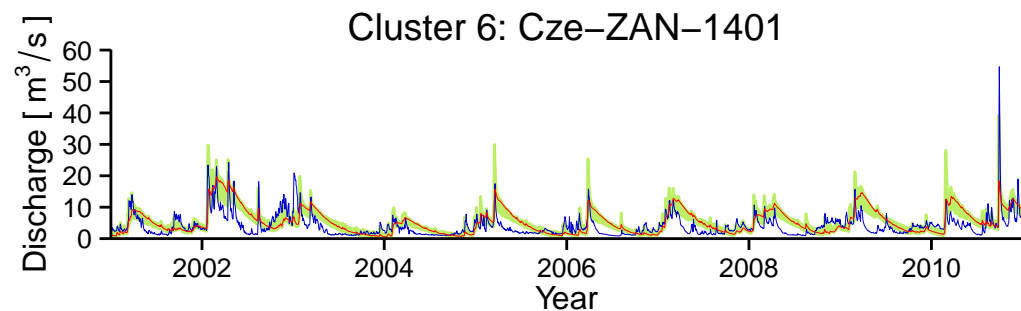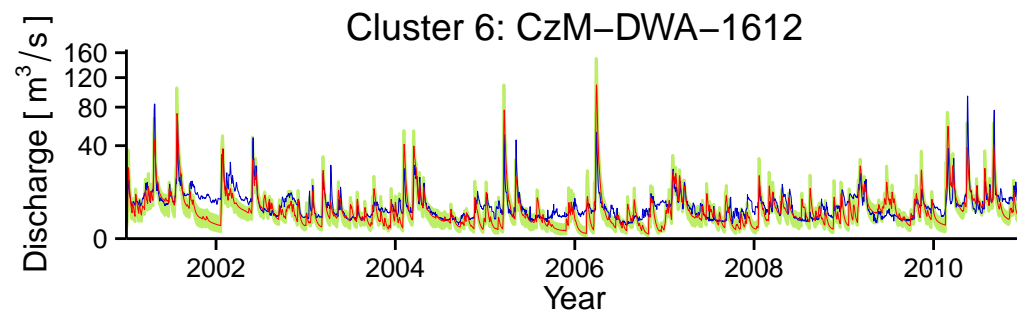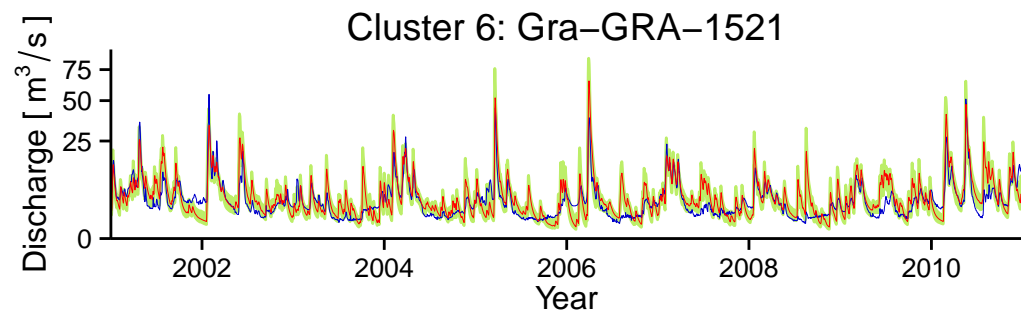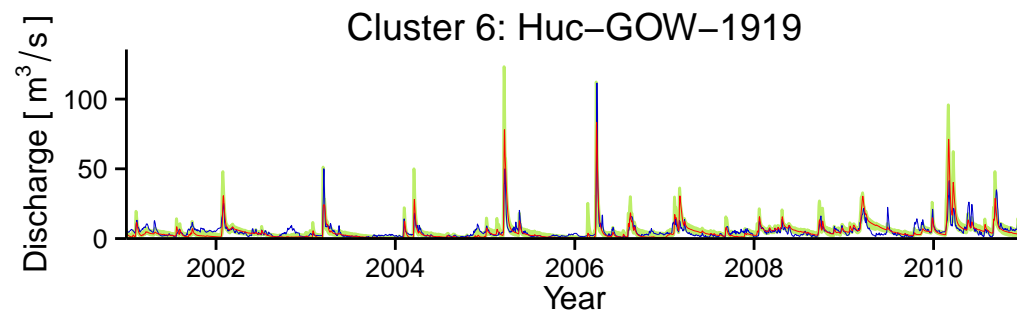

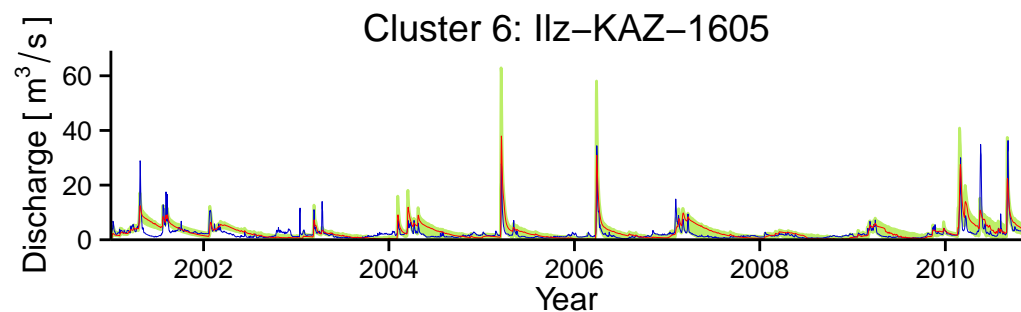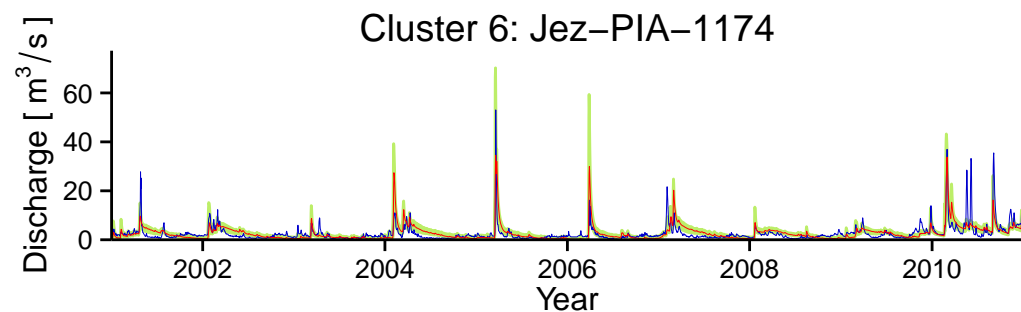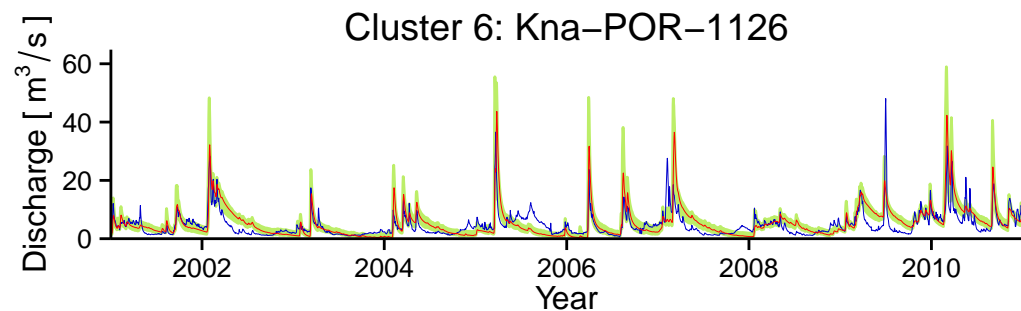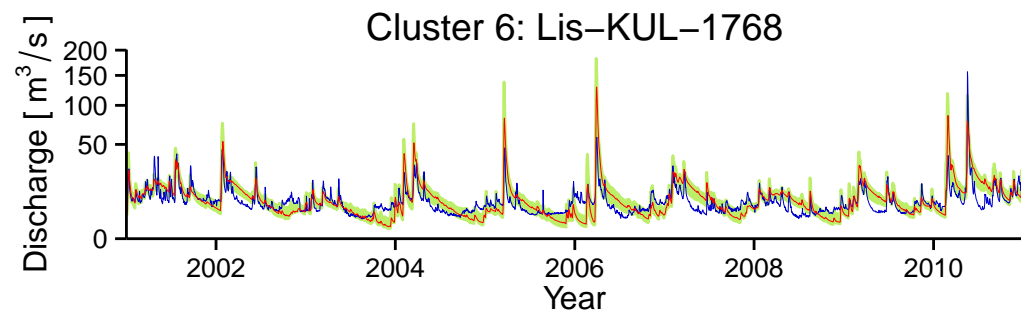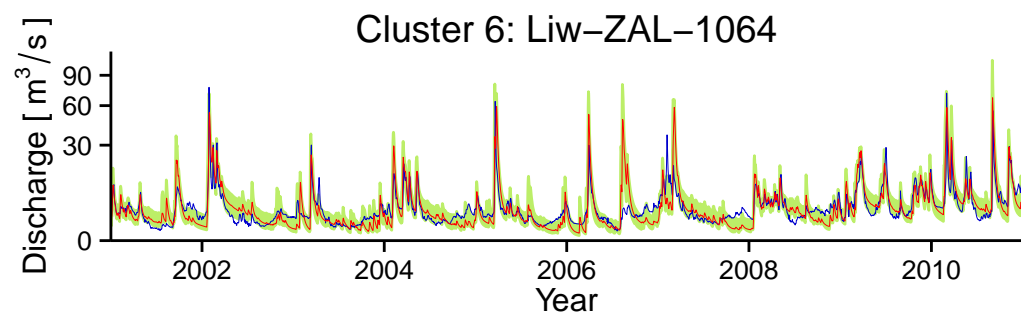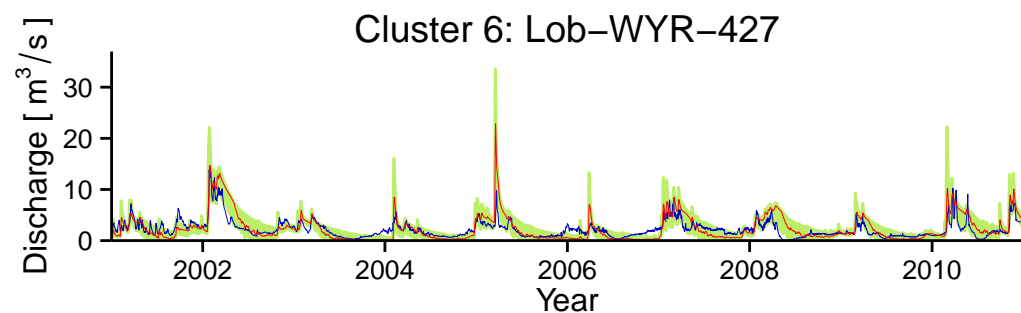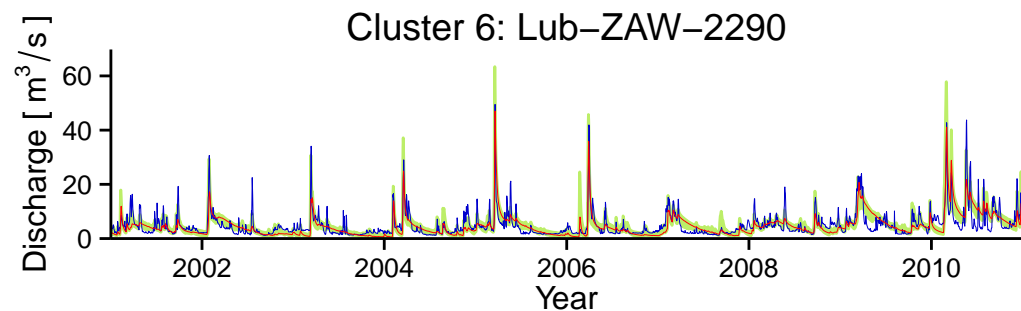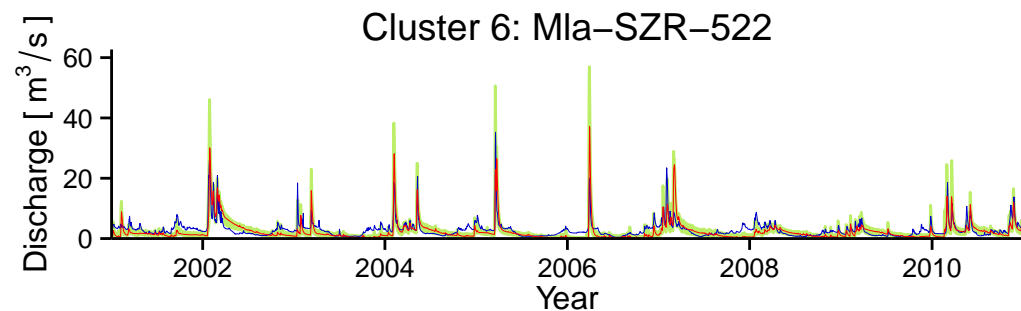



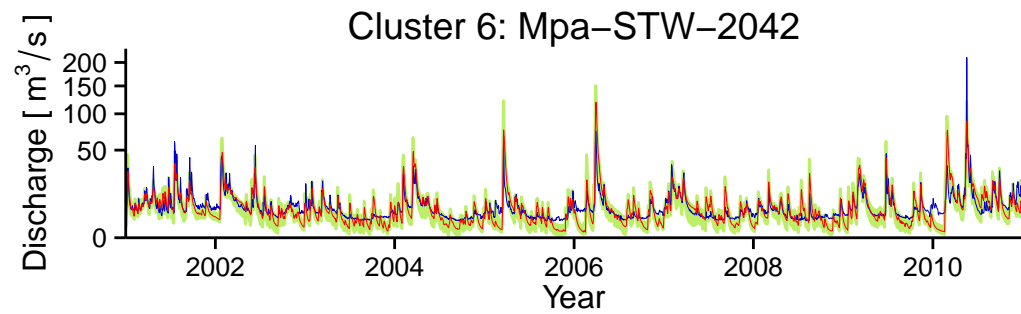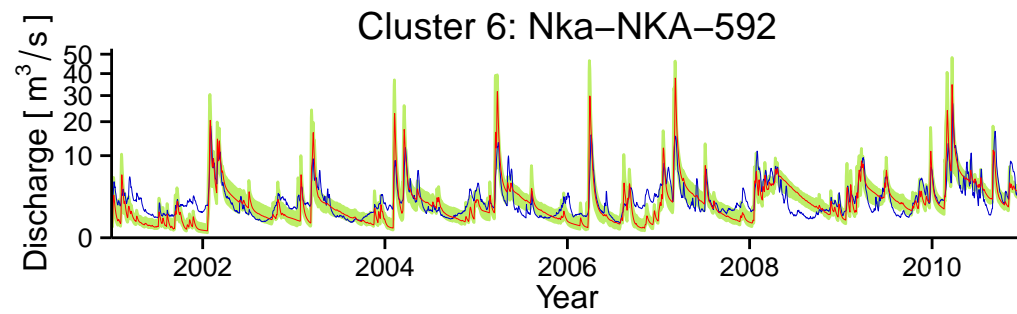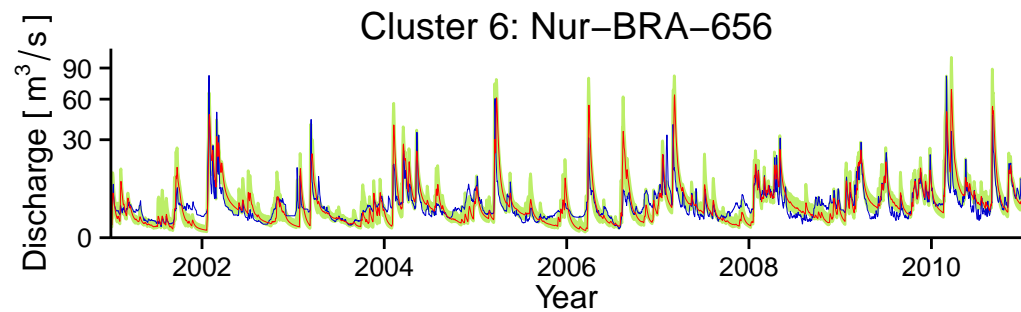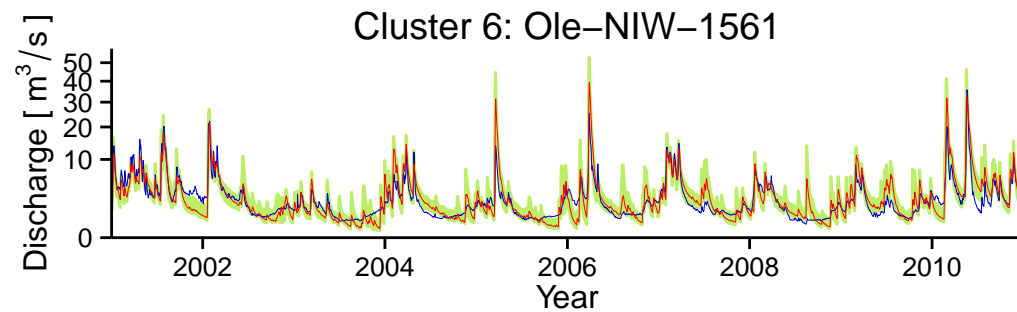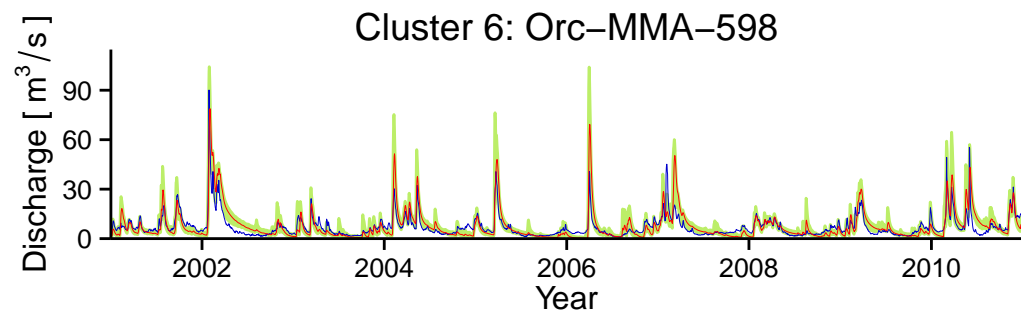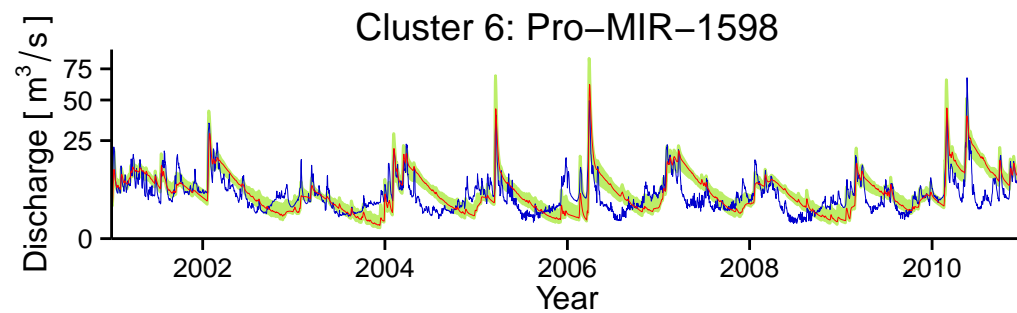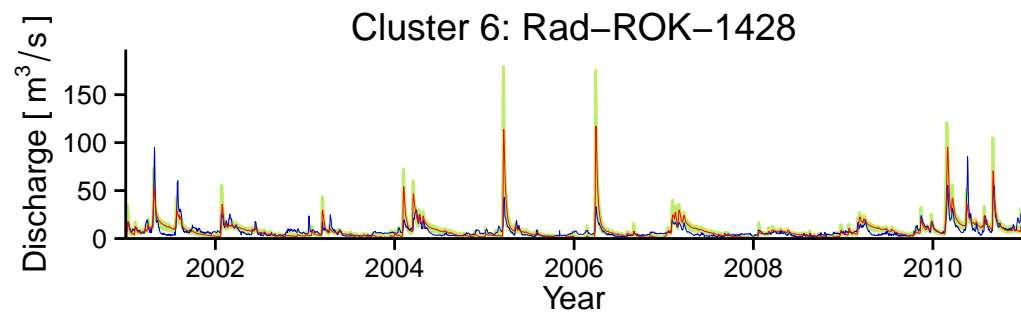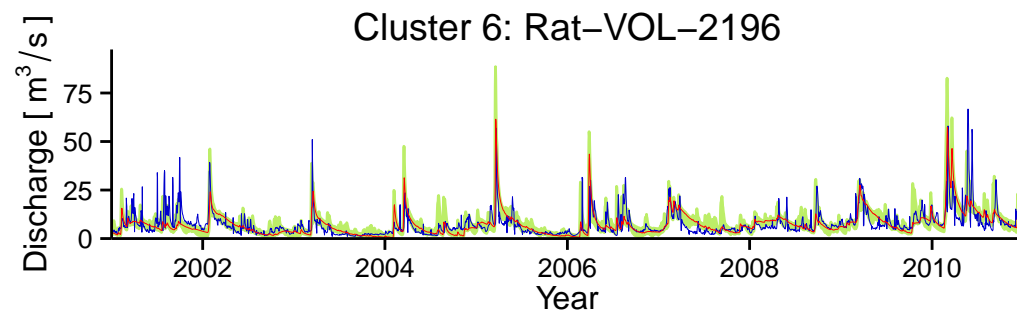

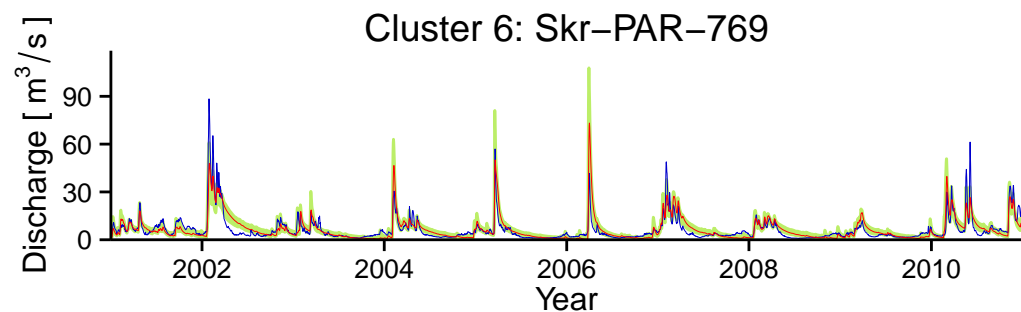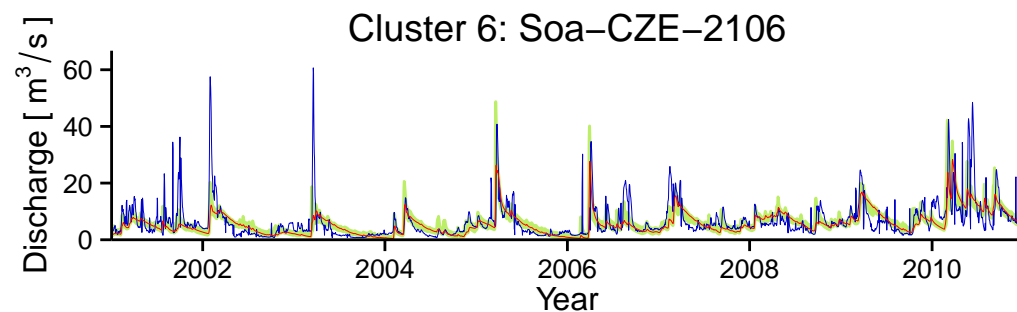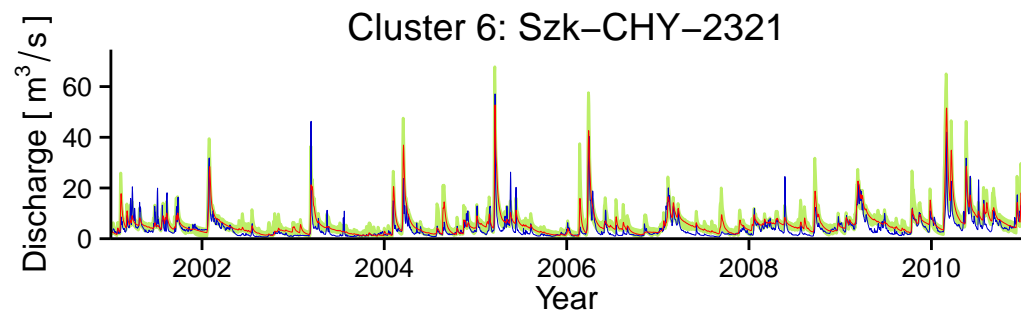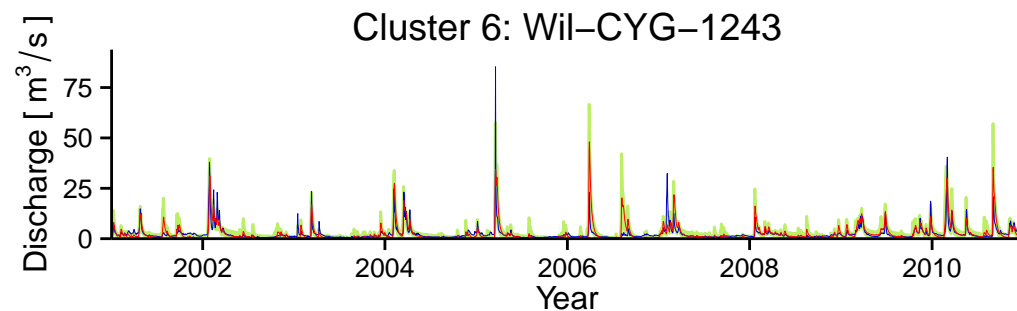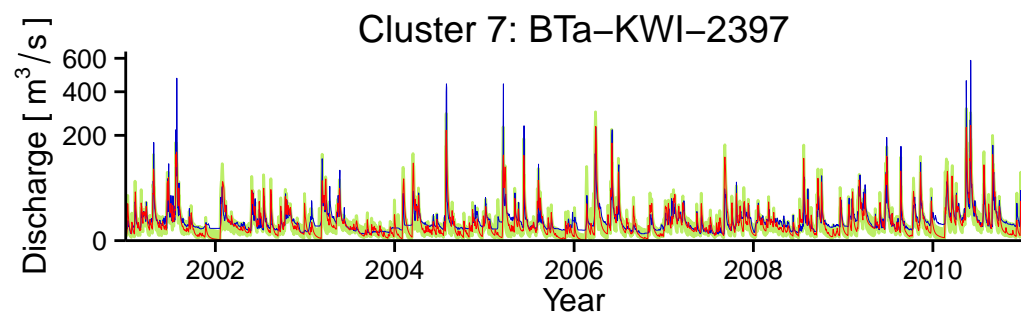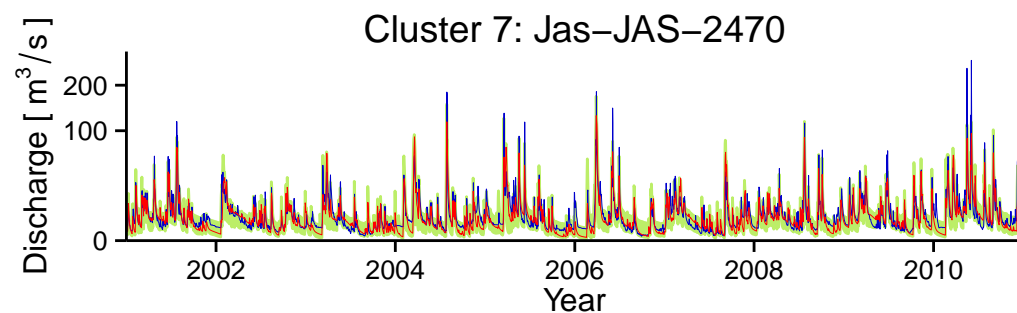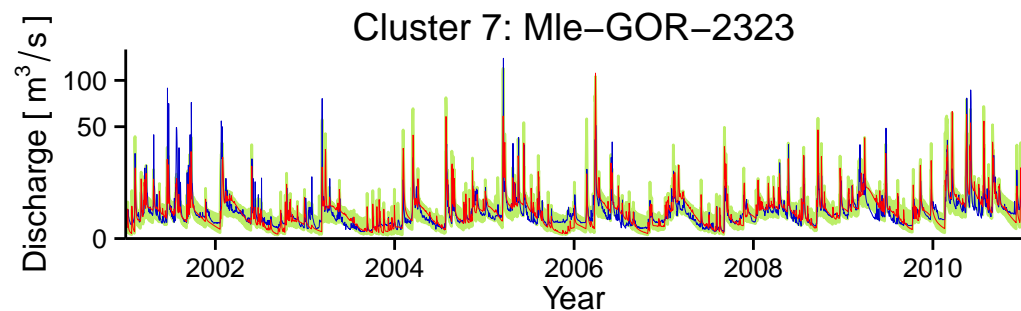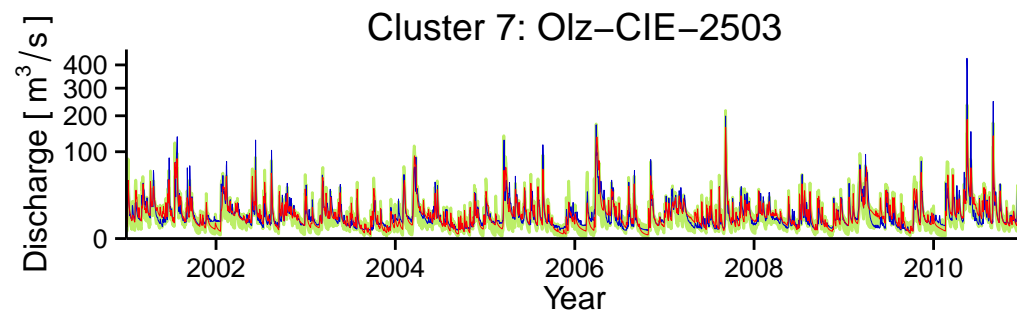



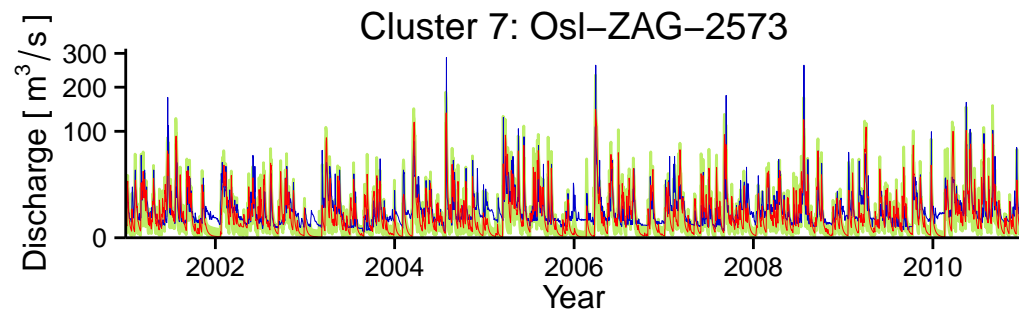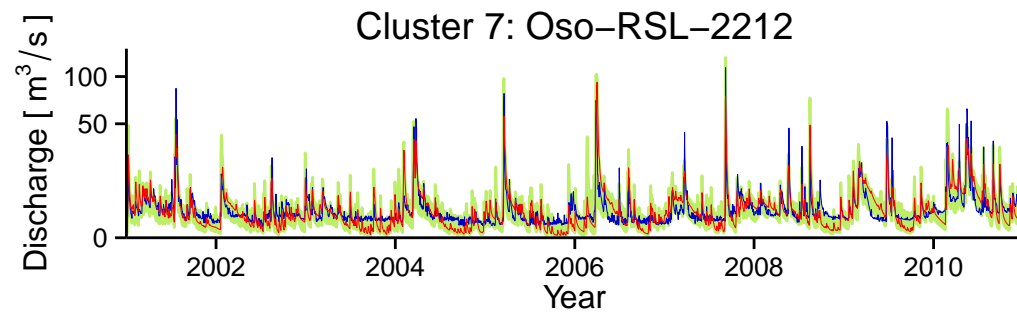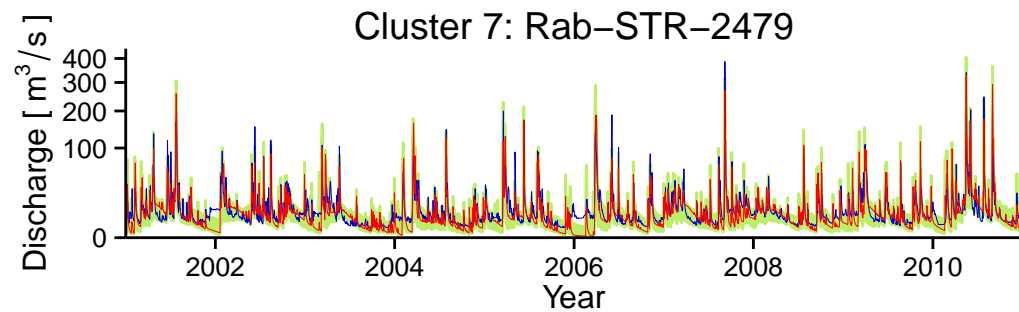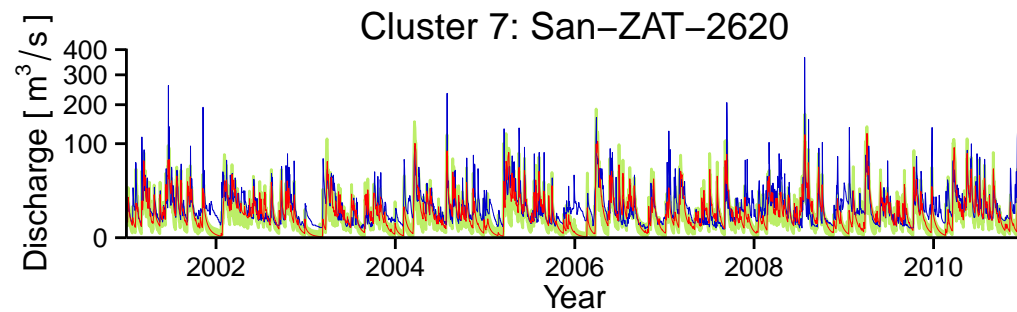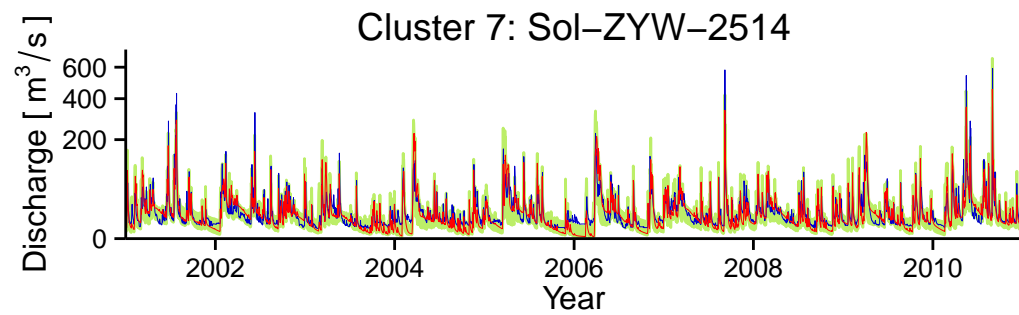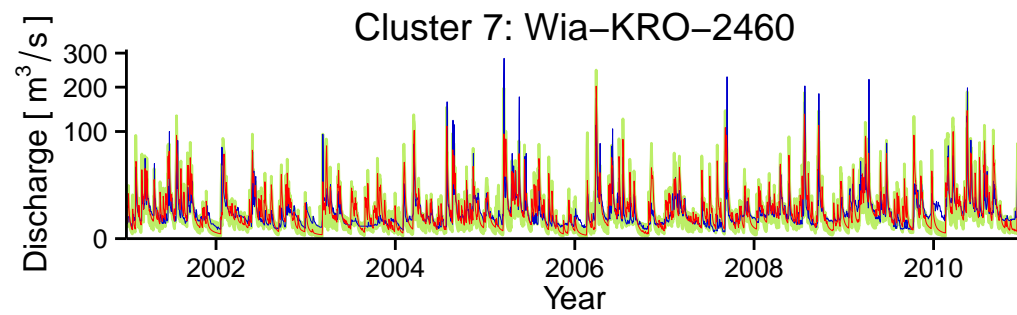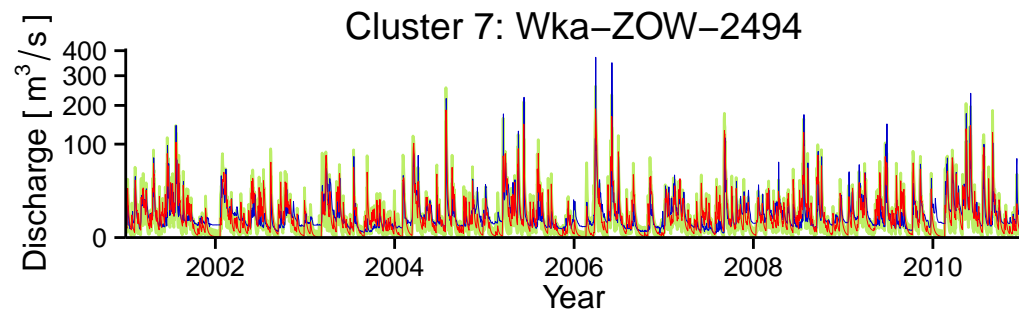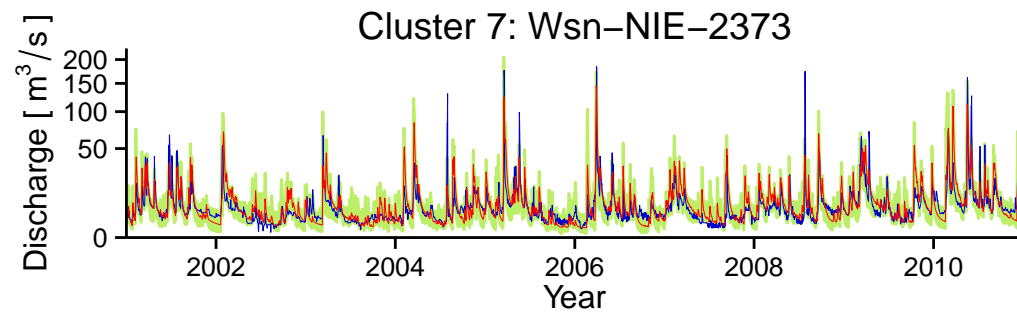

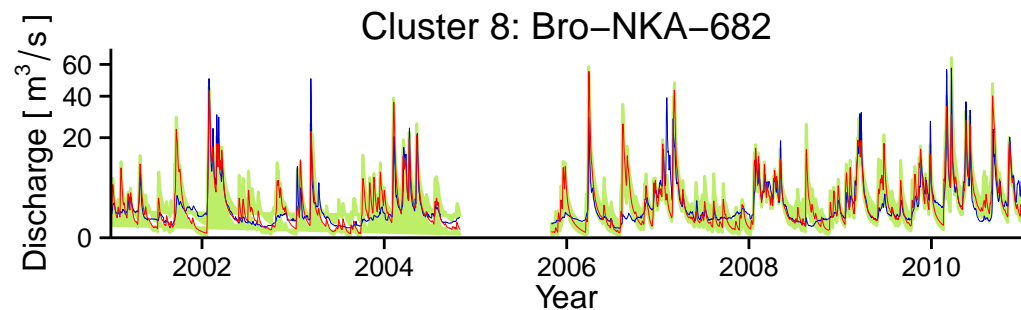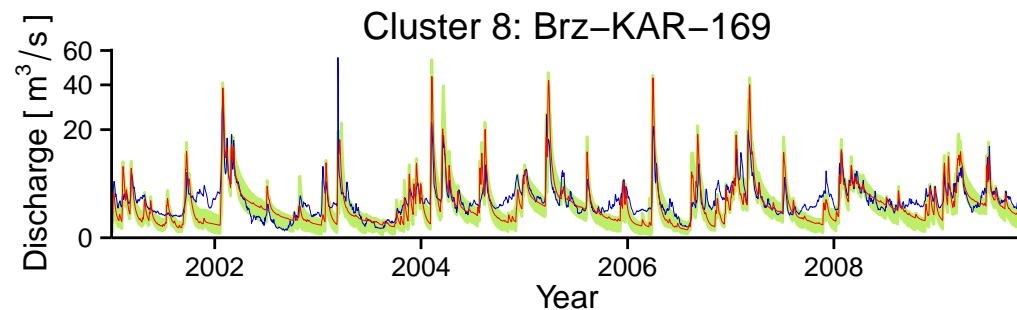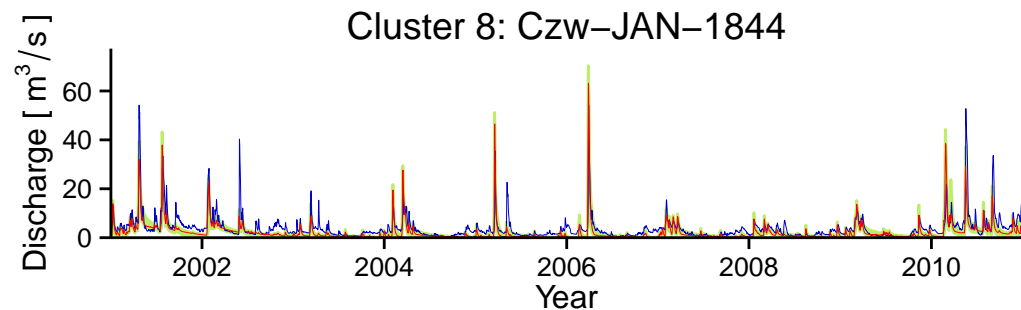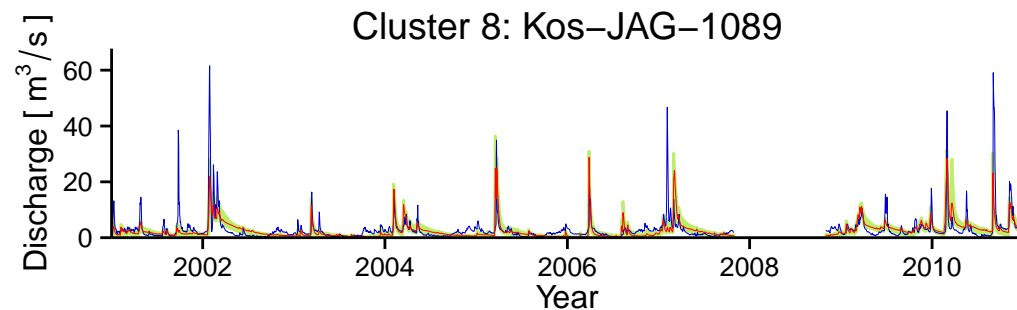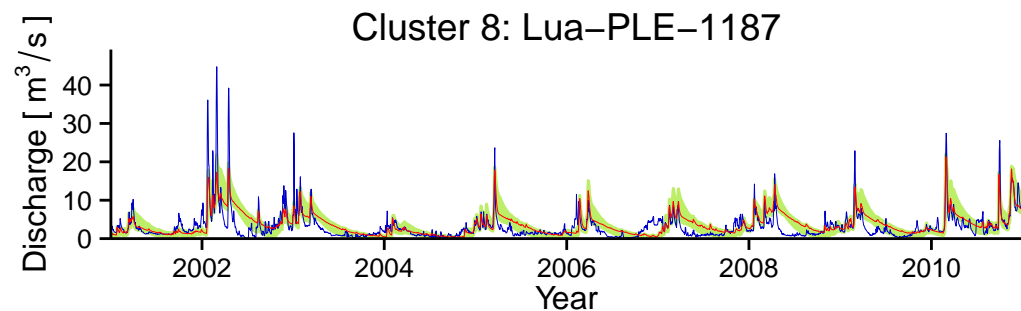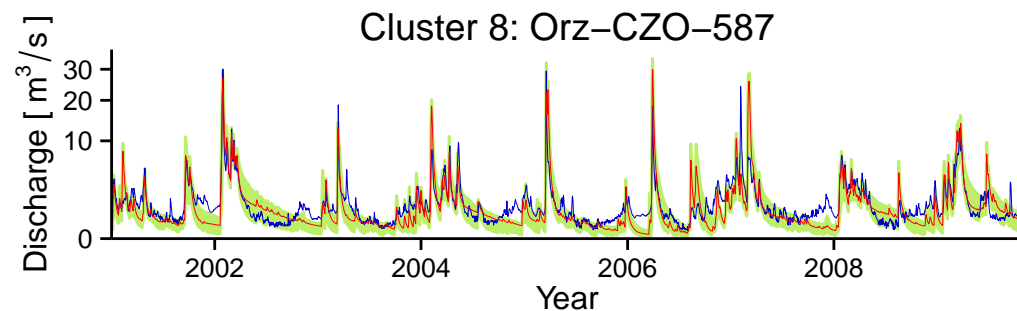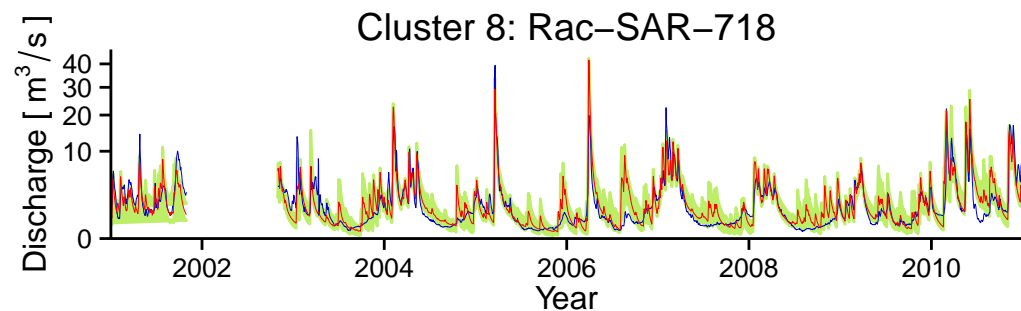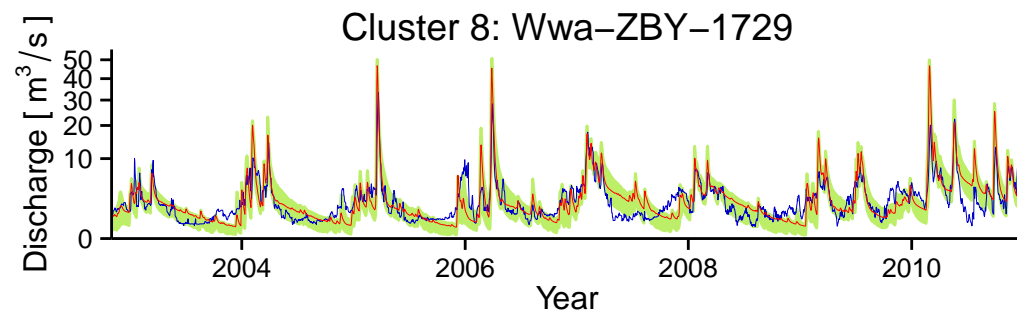

Supplement: Supplementary file 2 [file 2]
